# Supplementary material for: Genome-wide profiling of druggable active tumor defense mechanisms to enhance cancer immunotherapy
Source: bioRxiv or medRxiv preprint supplement (doi:10.1101/843185), 2019-11-18
Supplement: Supplementary file [file media-1.pdf]

**Table 1: Tumor genes identified as significantly depleted after genome 2CT screens**

| Screen 1       |         |                       | Screen 2       |         |                       |
|----------------|---------|-----------------------|----------------|---------|-----------------------|
| gene_id        | riger   | sigLabelSwitchFD<br>R | gene_id        | riger   | sigLabelSwitchFD<br>R |
| hsa-mir-1299   | 101.5   | 0.00000               | AHSG           | 197     | 0.00000               |
| ALG11          | 319.75  | 0.00001               | CHCHD10        | 237     | 0.00000               |
| BIRC2          | 327.75  | 0.00001               | CBLL1          | 260.25  | 0.00000               |
| FAM32A         | 342     | 0.00001               | KRTAP19-7      | 362.75  | 0.00001               |
| KIF3C          | 404.5   | 0.00001               | PRSS16         | 424.25  | 0.00001               |
| LAPTM4A        | 442.75  | 0.00002               | GOLGA7B        | 455     | 0.00001               |
| KRTAP3-2       | 490.5   | 0.00002               | FAM32A         | 480.25  | 0.00001               |
| ARSK           | 498.25  | 0.00002               | ARSD           | 489.75  | 0.00001               |
| HHLA3          | 532.25  | 0.00002               | hsa-mir-1299   | 490.5   | 0.00001               |
| LOC730183      | 543.5   | 0.00002               | PGM3           | 493.5   | 0.00001               |
| LRR1           | 617.5   | 0.00002               | APOBEC1        | 509.5   | 0.00001               |
| MED26          | 635.25  | 0.00002               | SFR1           | 563.75  | 0.00002               |
| hsa-mir-197    | 654.5   | 0.00002               | ENO4           | 662     | 0.00004               |
| TRAF2          | 703.25  | 0.00002               | SLC6A18        | 664.75  | 0.00004               |
| EIF3I          | 720.5   | 0.00002               | CXADR          | 685     | 0.00004               |
| RBM14          | 730.25  | 0.00003               | ZFYVE28        | 689.25  | 0.00004               |
| hsa-mir-181b-2 | 782     | 0.00004               | DNAJC16        | 694.25  | 0.00004               |
| VPS13D         | 800.5   | 0.00004               | SPDYA          | 701.25  | 0.00004               |
| SCRT1          | 825.5   | 0.00004               | hsa-mir-4435-1 | 764.75  | 0.00004               |
| HES4           | 830.25  | 0.00004               | ARL2BP         | 765.75  | 0.00004               |
| DPEP2          | 864.75  | 0.00005               | HLC5           | 769.25  | 0.00004               |
| MUC7           | 883.5   | 0.00005               | CCDC62         | 780.5   | 0.00004               |
| ASPH           | 894     | 0.00006               | RAD21          | 799.5   | 0.00004               |
| EMC2           | 907.5   | 0.00006               | hsa-mir-30d    | 834.5   | 0.00005               |
| OSTM1          | 939.75  | 0.00006               | CASKIN2        | 835.5   | 0.00005               |
| ZNF124         | 942.25  | 0.00006               | EMID1          | 893.25  | 0.00006               |
| DCUN1D1        | 960.75  | 0.00007               | TWIST2         | 905     | 0.00006               |
| TCEAL7         | 987     | 0.00007               | SMC5           | 905.5   | 0.00006               |
| RRM1           | 989.75  | 0.00007               | ECM1           | 944.25  | 0.00006               |
| SLC26A9        | 994.5   | 0.00007               | APPL1          | 958.75  | 0.00007               |
| TCEB3CL        | 997.75  | 0.00007               | COL11A1        | 966     | 0.00007               |
| ZNF136         | 1038    | 0.00008               | MRPS24         | 992.75  | 0.00007               |
| TMOD4          | 1038.5  | 0.00008               | THEMIS2        | 998.75  | 0.00007               |
| PACRG          | 1049.75 | 0.00008               | FOSL2          | 1006.75 | 0.00008               |
| RALGAPA2       | 1078.75 | 0.00008               | PUS10          | 1012.5  | 0.00008               |
| CLDND1         | 1095.25 | 0.00008               | GPR12          | 1037.5  | 0.00008               |

|              |         |         |              |         |         |
|--------------|---------|---------|--------------|---------|---------|
| PROL1        | 1099.25 | 0.00008 | SCAF11       | 1046.25 | 0.00009 |
| TDO2         | 1133    | 0.00010 | ISCU         | 1049.5  | 0.00009 |
| MT1B         | 1171.25 | 0.00010 | EIF3I        | 1052.25 | 0.00009 |
| COG3         | 1177.5  | 0.00011 | POLR2B       | 1069    | 0.00009 |
| CHMP7        | 1200    | 0.00012 | ACSL1        | 1071.75 | 0.00009 |
| TMX4         | 1202    | 0.00012 | ZNF232       | 1080.5  | 0.00009 |
| GIMD1        | 1202.75 | 0.00012 | KAT5         | 1105    | 0.00009 |
| METTL14      | 1241.75 | 0.00012 | ZGPAT        | 1114.25 | 0.00009 |
| ORC1         | 1257    | 0.00013 | ZBBX         | 1123.5  | 0.00009 |
| CWC27        | 1264.25 | 0.00013 | RLN3         | 1123.75 | 0.00009 |
| DPAGT1       | 1275    | 0.00013 | PPCS         | 1129.5  | 0.00010 |
| GPS2         | 1276.75 | 0.00013 | TMIGD1       | 1132    | 0.00010 |
| SCEL         | 1278.25 | 0.00013 | RPL6         | 1153.75 | 0.00010 |
| ARMC3        | 1279.5  | 0.00013 | ST8SIA6      | 1161    | 0.00010 |
| RBM10        | 1294.5  | 0.00013 | UBE2N        | 1177.25 | 0.00011 |
| hsa-mir-6775 | 1354.75 | 0.00016 | hsa-mir-597  | 1196.25 | 0.00011 |
| RNF31        | 1355.75 | 0.00016 | MUT          | 1200    | 0.00012 |
| SCD5         | 1356    | 0.00016 | MPG          | 1200.75 | 0.00012 |
| MPL          | 1376.75 | 0.00016 | AHSA1        | 1249.25 | 0.00012 |
| NHSL1        | 1383    | 0.00016 | TOR1AIP1     | 1279.5  | 0.00013 |
| CNGB1        | 1424.5  | 0.00017 | hsa-mir-3652 | 1289    | 0.00013 |
| C22orf26     | 1425    | 0.00017 | SNAP25       | 1295.5  | 0.00014 |
| CLEC16A      | 1448.25 | 0.00018 | ITSN2        | 1356.25 | 0.00016 |
| hsa-mir-1207 | 1453    | 0.00018 | CCR8         | 1391.5  | 0.00016 |
| NLRC5        | 1456.25 | 0.00018 | PIF1         | 1441    | 0.00017 |
| DDX21        | 1460.5  | 0.00018 | TAS2R14      | 1451.5  | 0.00017 |
| FBXW7        | 1475    | 0.00018 | OR2D3        | 1466.5  | 0.00018 |
| MOBP         | 1507.25 | 0.00019 | STK11IP      | 1472.25 | 0.00018 |
| SART3        | 1513    | 0.00019 | DHX35        | 1473    | 0.00018 |
| NKX1-2       | 1536.75 | 0.00019 | SHOC2        | 1545    | 0.00020 |
| RPL23        | 1540.25 | 0.00019 | FIGLA        | 1589    | 0.00022 |
| YTHDF2       | 1591.5  | 0.00021 | CRCP         | 1605    | 0.00022 |
| hsa-mir-615  | 1592.25 | 0.00021 | CY5R3        | 1613.75 | 0.00023 |
| PRAMEF20     | 1604.25 | 0.00022 | CAT          | 1633.75 | 0.00023 |
| IL3          | 1604.75 | 0.00022 | ATG13        | 1650.25 | 0.00024 |
| GABRR2       | 1620.75 | 0.00022 | PHAX         | 1673    | 0.00024 |
| OR5H14       | 1623    | 0.00022 | GUF1         | 1685.25 | 0.00024 |
| CHST10       | 1632.25 | 0.00023 | NDUFS8       | 1714.75 | 0.00025 |
| RPL13        | 1638.75 | 0.00023 | NAPSA        | 1737.5  | 0.00026 |

|                |         |         |  |              |         |         |
|----------------|---------|---------|--|--------------|---------|---------|
| HIST2H2BE      | 1643.75 | 0.00023 |  | MX2          | 1744.75 | 0.00026 |
| THOP1          | 1649.25 | 0.00023 |  | PRTG         | 1750.25 | 0.00026 |
| DGAT2L6        | 1669.5  | 0.00024 |  | OARD1        | 1754    | 0.00026 |
| KRTAP19-6      | 1697    | 0.00024 |  | BTG3         | 1767.25 | 0.00026 |
| SUPT5H         | 1704    | 0.00024 |  | CHST3        | 1799.5  | 0.00028 |
| NLRP8          | 1706.25 | 0.00024 |  | PPIA         | 1847.75 | 0.00029 |
| OR4C11         | 1707    | 0.00024 |  | SH2B3        | 1853    | 0.00029 |
| SLC25A24       | 1716.75 | 0.00024 |  | HIF3A        | 1860.25 | 0.00029 |
| VPS29          | 1720.5  | 0.00024 |  | ATL2         | 1862    | 0.00029 |
| TMEM47         | 1734    | 0.00025 |  | IL9          | 1871.25 | 0.00029 |
| LRRC4          | 1752.75 | 0.00025 |  | DESI2        | 1886.5  | 0.00030 |
| ZNF227         | 1783.25 | 0.00026 |  | CDC20        | 1886.75 | 0.00030 |
| FBXO36         | 1809.75 | 0.00028 |  | ATG16L2      | 1887.5  | 0.00030 |
| GIC2           | 1815.5  | 0.00028 |  | BTBD2        | 1890.25 | 0.00030 |
| GPD1L          | 1816    | 0.00028 |  | KIF21A       | 1900.75 | 0.00031 |
| ZPLD1          | 1823    | 0.00028 |  | NEURL2       | 1911.5  | 0.00031 |
| P4HA2          | 1825.25 | 0.00028 |  | SLC44A1      | 1925    | 0.00031 |
| hsa-mir-4442   | 1852.5  | 0.00030 |  | MRPL34       | 1993.5  | 0.00033 |
| ROS1           | 1873.25 | 0.00031 |  | TMED2        | 2018    | 0.00034 |
| TTC30A         | 1881.5  | 0.00031 |  | PDK3         | 2062.25 | 0.00036 |
| POLRMT         | 1887.75 | 0.00031 |  | FMNL3        | 2076    | 0.00037 |
| RBL2           | 1891.25 | 0.00031 |  | OXCT1        | 2084    | 0.00037 |
| SEH1L          | 1909.25 | 0.00032 |  | C8orf42      | 2101.25 | 0.00038 |
| DDX59          | 1914.75 | 0.00032 |  | PCCB         | 2124.25 | 0.00039 |
| SERTAD2        | 1929.75 | 0.00032 |  | SPATA31A6    | 2126.25 | 0.00039 |
| ABI3BP         | 1930.75 | 0.00032 |  | NRCAM        | 2135.5  | 0.00039 |
| DPT            | 1978    | 0.00034 |  | hsa-mir-519c | 2152.5  | 0.00040 |
| GRHPR          | 2012    | 0.00035 |  | GAR1         | 2155.75 | 0.00040 |
| KRTAP4-9       | 2017    | 0.00035 |  | TMEM91       | 2179.25 | 0.00041 |
| LCN2           | 2017.75 | 0.00035 |  | RBL2         | 2188    | 0.00042 |
| MEX3B          | 2029.25 | 0.00035 |  | HPS6         | 2228.75 | 0.00043 |
| RLTPR          | 2030    | 0.00035 |  | EGR2         | 2232.25 | 0.00044 |
| POLR3H         | 2037.5  | 0.00035 |  | CCNB1IP1     | 2233    | 0.00044 |
| RAD17          | 2048.5  | 0.00036 |  | SAA2         | 2237    | 0.00044 |
| CCDC125        | 2081.75 | 0.00037 |  | hsa-mir-3687 | 2256    | 0.00044 |
| UQCR11         | 2095.75 | 0.00037 |  | ITGA7        | 2289    | 0.00046 |
| LCE2C          | 2111.5  | 0.00038 |  | DSTN         | 2294.75 | 0.00046 |
| hsa-mir-3180-3 | 2158.75 | 0.00041 |  | ENY2         | 2308    | 0.00046 |
| FAM3B          | 2161.25 | 0.00041 |  | PIP5KL1      | 2314.25 | 0.00046 |

|                |         |         |              |         |         |
|----------------|---------|---------|--------------|---------|---------|
| DNMT3B         | 2187.75 | 0.00042 | VAMP8        | 2330.5  | 0.00047 |
| RPS25          | 2218    | 0.00043 | KIF3A        | 2340    | 0.00047 |
| TRIM43B        | 2234.5  | 0.00044 | ISX          | 2344.5  | 0.00047 |
| IFIT1          | 2236.5  | 0.00044 | GNL3L        | 2344.5  | 0.00047 |
| PPP1R3F        | 2250.5  | 0.00045 | RASSF8       | 2367.5  | 0.00048 |
| SNRPD3         | 2270.75 | 0.00045 | FMO4         | 2399.75 | 0.00050 |
| hsa-mir-6726   | 2315    | 0.00046 | SYCE1        | 2414.25 | 0.00050 |
| hsa-mir-147a   | 2321    | 0.00046 | IL17D        | 2421    | 0.00050 |
| TCEAL6         | 2325.25 | 0.00046 | CINP         | 2423.5  | 0.00050 |
| STRAP          | 2334.75 | 0.00046 | PRPF3        | 2483.5  | 0.00053 |
| DIDO1          | 2397    | 0.00049 | FBXL13       | 2484    | 0.00053 |
| EIF4G1         | 2413.5  | 0.00050 | EIF2A        | 2484.5  | 0.00053 |
| C2orf49        | 2413.75 | 0.00050 | ATP8B4       | 2501    | 0.00053 |
| SPRR1B         | 2420.25 | 0.00050 | ALG11        | 2518.5  | 0.00054 |
| TRAF3IP3       | 2462.25 | 0.00053 | DDIT4L       | 2525.5  | 0.00055 |
| C22orf23       | 2466    | 0.00053 | GATA2        | 2529.75 | 0.00055 |
| TMEM184A       | 2493    | 0.00053 | IGSF9        | 2535    | 0.00056 |
| CDC123         | 2508.75 | 0.00053 | hsa-mir-146b | 2553.5  | 0.00056 |
| B3GNT8         | 2523.25 | 0.00054 | DPY19L4      | 2613.5  | 0.00059 |
| SLC6A6         | 2547.75 | 0.00055 | C15orf61     | 2640.25 | 0.00059 |
| ADM5           | 2548    | 0.00055 | CDCA8        | 2681.75 | 0.00061 |
| TRA2B          | 2565.25 | 0.00056 | DDX46        | 2689.25 | 0.00062 |
| ATF4           | 2577.75 | 0.00057 | ZNF469       | 2705    | 0.00063 |
| SLC7A9         | 2590.75 | 0.00058 | OR52E2       | 2712    | 0.00063 |
| hsa-mir-1289-1 | 2594.5  | 0.00058 | NPAS2        | 2718.5  | 0.00064 |
| CYBR3          | 2601.5  | 0.00058 | P2RX4        | 2724.75 | 0.00064 |
| hsa-mir-4539   | 2623.5  | 0.00059 | NFKBIL1      | 2780    | 0.00067 |
| SLC5A7         | 2652.75 | 0.00061 | TLCD2        | 2836.75 | 0.00072 |
| RIOK1          | 2687.75 | 0.00064 | LILRA4       | 2848    | 0.00072 |
| CCDC58         | 2705.75 | 0.00065 | SRSF2        | 2902.5  | 0.00075 |
| hsa-mir-4456   | 2714.75 | 0.00066 | MYH4         | 2909.75 | 0.00076 |
| FKBP6          | 2740.75 | 0.00068 | KAL1         | 2955.75 | 0.00078 |
| COLEC11        | 2742    | 0.00068 | ABHD3        | 2970    | 0.00079 |
| C9orf85        | 2752.75 | 0.00069 | PGD          | 2970.25 | 0.00079 |
| SUMO1          | 2791    | 0.00070 | RELB         | 3007.5  | 0.00081 |
| RAB17          | 2811.5  | 0.00071 | PCNA         | 3011.75 | 0.00081 |
| SNRPF          | 2815.25 | 0.00071 | RALB         | 3021.25 | 0.00082 |
| PLK2           | 2840.5  | 0.00073 | COL5A1       | 3035.5  | 0.00082 |
| EML3           | 2841.75 | 0.00073 | HAL          | 3037.25 | 0.00083 |

|              |         |         |                                           |         |         |
|--------------|---------|---------|-------------------------------------------|---------|---------|
| LPPR5        | 2845.25 | 0.00073 | hsa-mir-4538                              | 3042.25 | 0.00083 |
| RPAP2        | 2847.5  | 0.00073 | OR1L8                                     | 3050.5  | 0.00083 |
| SLC9C2       | 2862.5  | 0.00074 | NonTargetingControlGuideForHuman_056<br>1 | 3078.25 | 0.00086 |
| CDC45        | 2877.5  | 0.00074 | HDDC2                                     | 3099.5  | 0.00087 |
| hsa-mir-6868 | 2935    | 0.00076 | hsa-mir-8060                              | 3129.25 | 0.00088 |
| SFPQ         | 2936.5  | 0.00076 | IL6                                       | 3130    | 0.00089 |
| SLC5A9       | 2939.75 | 0.00076 | PNMA3                                     | 3161.25 | 0.00090 |
| CHST13       | 2940.5  | 0.00076 | LOC100507462                              | 3239.25 | 0.00095 |
| VAV1         | 2996.25 | 0.00078 | BIRC2                                     | 3240.25 | 0.00095 |
| hsa-mir-208a | 3002.25 | 0.00078 | hsa-mir-1825                              | 3241.25 | 0.00095 |
| ENY2         | 3013.75 | 0.00079 | LRRFIP2                                   | 3243.75 | 0.00095 |
| GALR3        | 3025    | 0.00079 | SBNO1                                     | 3288    | 0.00098 |
| MTA1         | 3028.25 | 0.00080 | KCNG2                                     | 3312    | 0.00100 |
| DDX1         | 3049.75 | 0.00081 | MYO1E                                     | 3312.5  | 0.00100 |
| hsa-mir-4651 | 3050.25 | 0.00081 | RQCD1                                     | 3319.25 | 0.00101 |
| TYW5         | 3051.25 | 0.00081 | MADD                                      | 3359.75 | 0.00104 |
| BAP1         | 3068.25 | 0.00082 | KRTAP5-11                                 | 3373.25 | 0.00104 |
| ATP6V1C1     | 3100.75 | 0.00082 | CAV1                                      | 3386.75 | 0.00106 |
| ALDH2        | 3119.75 | 0.00083 | CCNA2                                     | 3397.75 | 0.00107 |
| hsa-mir-3129 | 3124.5  | 0.00083 | REG1B                                     | 3415.75 | 0.00108 |
| RRH          | 3137.25 | 0.00085 | IL1R1                                     | 3469.5  | 0.00111 |
| CHRM3        | 3142.25 | 0.00085 | PDCL2                                     | 3473.5  | 0.00111 |
| SF1          | 3183.25 | 0.00087 | OR1L6                                     | 3501.5  | 0.00113 |
| OCEL1        | 3211.75 | 0.00089 | RPS26                                     | 3502.5  | 0.00113 |
| FFAR3        | 3216.5  | 0.00089 | hsa-mir-4697                              | 3526.75 | 0.00114 |
| ACTC1        | 3216.5  | 0.00089 | WIBG                                      | 3561    | 0.00117 |
| PPFIBP1      | 3246.25 | 0.00090 | PSTK                                      | 3562.75 | 0.00117 |
| hsa-mir-6794 | 3262.25 | 0.00091 | TMED10                                    | 3564    | 0.00117 |
| MTMR14       | 3265.5  | 0.00091 | CEBPG                                     | 3593.25 | 0.00119 |
| INSL4        | 3293.5  | 0.00093 | DEGS2                                     | 3611.25 | 0.00119 |
| CHRNA3       | 3298.75 | 0.00094 | C12orf56                                  | 3620.5  | 0.00120 |
| hsa-mir-663b | 3299.25 | 0.00094 | DLD                                       | 3685    | 0.00124 |
| WARS2        | 3313.25 | 0.00094 | TDGF1                                     | 3693.25 | 0.00124 |
| ATAD5        | 3325.75 | 0.00095 | PIH1D3                                    | 3701    | 0.00124 |
| hsa-mir-5787 | 3331.5  | 0.00095 | BUD31                                     | 3721.5  | 0.00126 |
| PSMC5        | 3336    | 0.00096 | TRPV6                                     | 3721.5  | 0.00126 |
| LOC100507462 | 3336.25 | 0.00096 | SPC25                                     | 3724.25 | 0.00126 |
| PRPF40A      | 3356.5  | 0.00096 | DNAJB8                                    | 3769    | 0.00128 |
| SLC2A8       | 3361.25 | 0.00097 | NonTargetingControlGuideForHuman_085<br>2 | 3828.25 | 0.00132 |

|              |         |         |                                           |         |         |
|--------------|---------|---------|-------------------------------------------|---------|---------|
| MRPL44       | 3365.25 | 0.00097 | NonTargetingControlGuideForHuman_076<br>6 | 3832    | 0.00132 |
| RPF1         | 3366.25 | 0.00097 | KLHL31                                    | 3832.25 | 0.00132 |
| TTF2         | 3392.5  | 0.00099 | hsa-mir-1289-1                            | 3835    | 0.00133 |
| GLYAT        | 3408.75 | 0.00099 | PSD4                                      | 3837.5  | 0.00133 |
| ZNF69        | 3437    | 0.00102 | CUL4A                                     | 3874.25 | 0.00135 |
| BYSL         | 3442.5  | 0.00103 | LCK                                       | 3878    | 0.00136 |
| KAL1         | 3448.25 | 0.00103 | RLN1                                      | 3901.25 | 0.00138 |
| hsa-mir-3143 | 3456.75 | 0.00103 | CSPG5                                     | 3931.5  | 0.00139 |
| PGS1         | 3471.5  | 0.00105 | KRTAP5-10                                 | 3932.5  | 0.00140 |
| WBP2         | 3486.75 | 0.00106 | hsa-mir-1251                              | 3994    | 0.00144 |
| ZNF480       | 3494    | 0.00106 | ARHGEF11                                  | 4001.25 | 0.00144 |
| PHYH         | 3549.5  | 0.00109 | ZMYND15                                   | 4046.5  | 0.00148 |
| COX5B        | 3552    | 0.00109 | AZI1                                      | 4049    | 0.00148 |
| PTMS         | 3554.5  | 0.00109 | PTPRCAP                                   | 4089    | 0.00152 |
| EEF1B2       | 3558    | 0.00110 | CCDC172                                   | 4108.25 | 0.00153 |
| MXD4         | 3580.5  | 0.00110 | ZNF778                                    | 4117.75 | 0.00154 |
| HOXB8        | 3593.5  | 0.00111 | LAMTOR3                                   | 4157    | 0.00158 |
| TMEM144      | 3609.75 | 0.00112 | 2-Mar                                     | 4158.5  | 0.00158 |
| SOX18        | 3612    | 0.00112 | ISCA2                                     | 4167.5  | 0.00160 |
| RBM14-RBM4   | 3649.75 | 0.00114 | POGLUT1                                   | 4169    | 0.00160 |
| hsa-mir-485  | 3674.75 | 0.00117 | WBP11                                     | 4171    | 0.00160 |
| BRICD5       | 3702.25 | 0.00119 | SYDE2                                     | 4239.75 | 0.00166 |
| PPP1R27      | 3747.75 | 0.00122 | PDP1                                      | 4293.75 | 0.00170 |
| hsa-mir-6880 | 3803.25 | 0.00125 | PGR                                       | 4309.75 | 0.00171 |
| KRTAP4-6     | 3812.5  | 0.00126 | LOC440563                                 | 4314.5  | 0.00172 |
| hsa-mir-4425 | 3813    | 0.00126 | CHGA                                      | 4316.25 | 0.00172 |
| AKIRIN1      | 3841.75 | 0.00127 | ANKRD42                                   | 4331.25 | 0.00173 |
| FAM114A2     | 3845.5  | 0.00127 | SHARPIN                                   | 4346.75 | 0.00174 |
| IL36RN       | 3861    | 0.00128 | SRGAP2                                    | 4355.5  | 0.00174 |
| PRPF3        | 3902.25 | 0.00132 | TMEM37                                    | 4364.75 | 0.00175 |
| hsa-mir-548w | 3941.75 | 0.00135 | RPL12                                     | 4374    | 0.00176 |
| THAP5        | 3951.5  | 0.00136 | ELTD1                                     | 4390.25 | 0.00176 |
| DPM2         | 3955.5  | 0.00136 | MT3                                       | 4394.25 | 0.00176 |
| CDR2L        | 3964.25 | 0.00136 | GART                                      | 4396.5  | 0.00177 |
| WDR45B       | 4002.5  | 0.00137 | TRIM37                                    | 4405.5  | 0.00177 |
| LYRM1        | 4044.5  | 0.00140 | KRTAP5-1                                  | 4411.5  | 0.00178 |
| PTPLAD1      | 4053.5  | 0.00140 | SNX1                                      | 4428.5  | 0.00180 |
| NLRC4        | 4055.75 | 0.00140 | USP8                                      | 4429.75 | 0.00181 |
| OTOR         | 4095.25 | 0.00143 | KITLG                                     | 4443.25 | 0.00181 |

|                |         |         |               |         |         |
|----------------|---------|---------|---------------|---------|---------|
| DYDC1          | 4109.75 | 0.00145 | FAM216A       | 4447.75 | 0.00182 |
| BARHL2         | 4139.25 | 0.00147 | CDH7          | 4468.25 | 0.00183 |
| hsa-mir-3197   | 4151.5  | 0.00148 | EPB41         | 4487.25 | 0.00185 |
| PARP10         | 4173    | 0.00149 | TOM1L1        | 4487.75 | 0.00185 |
| TNFRSF10B      | 4226.5  | 0.00156 | PIP5K1A       | 4506.25 | 0.00187 |
| WFDC6          | 4236    | 0.00156 | FOLR1         | 4523.75 | 0.00188 |
| FAM126A        | 4238.5  | 0.00157 | MRPL45        | 4524.75 | 0.00189 |
| TAF4           | 4252.75 | 0.00158 | UQCRF51       | 4551.25 | 0.00192 |
| TMIGD1         | 4256    | 0.00158 | RPLP0         | 4567.25 | 0.00193 |
| hsa-mir-19a    | 4283.25 | 0.00159 | ADAMTS4       | 4570.75 | 0.00193 |
| LIN7A          | 4283.5  | 0.00159 | PDCD11        | 4659.5  | 0.00200 |
| POLR3F         | 4311.5  | 0.00163 | COPE          | 4700.5  | 0.00202 |
| RNPS1          | 4325.75 | 0.00164 | FAM50A        | 4719.5  | 0.00203 |
| STUB1          | 4333.25 | 0.00165 | DDX51         | 4785    | 0.00210 |
| CST4           | 4351.5  | 0.00167 | FOXD4L5       | 4811.75 | 0.00214 |
| BCL2           | 4373    | 0.00168 | NAALAD2       | 4818.25 | 0.00215 |
| POLD2          | 4428.5  | 0.00172 | RPAP2         | 4818.75 | 0.00215 |
| PUS7           | 4470.75 | 0.00176 | TAC1          | 4843.25 | 0.00217 |
| OR2B11         | 4497    | 0.00177 | DAOA          | 4852.75 | 0.00218 |
| COL7A1         | 4497.25 | 0.00177 | hsa-mir-2276  | 4871.5  | 0.00219 |
| CCDC151        | 4498.75 | 0.00177 | C14orf119     | 4877.25 | 0.00220 |
| HMGB4          | 4565.75 | 0.00182 | NME8          | 4883.5  | 0.00221 |
| TOP1           | 4568.5  | 0.00182 | TBCD          | 4890.75 | 0.00221 |
| UBE2I          | 4579.5  | 0.00183 | DLGAP4        | 4962    | 0.00229 |
| ABCG8          | 4616.25 | 0.00185 | hsa-mir-3185  | 4990.75 | 0.00231 |
| SLA2           | 4661.5  | 0.00189 | ZNF350        | 5005.75 | 0.00232 |
| TREML1         | 4665.5  | 0.00190 | PRRG1         | 5008.25 | 0.00232 |
| CHMP4B         | 4666.5  | 0.00190 | MAGEA3        | 5032    | 0.00233 |
| MAT2A          | 4670    | 0.00190 | MAL           | 5051.75 | 0.00235 |
| ZBTB41         | 4678.75 | 0.00190 | KISS1R        | 5101.75 | 0.00239 |
| CASP6          | 4683.5  | 0.00191 | MGA           | 5164.5  | 0.00244 |
| METTL2B        | 4721.75 | 0.00195 | CELSR2        | 5180.25 | 0.00246 |
| RHO            | 4734.5  | 0.00196 | ERO1L         | 5184.75 | 0.00246 |
| HOXC8          | 4744.25 | 0.00196 | BCL2          | 5231.25 | 0.00250 |
| hsa-mir-320c-1 | 4750    | 0.00197 | RPH3AL        | 5243    | 0.00250 |
| RPS16          | 4755    | 0.00197 | TXNDC16       | 5261    | 0.00252 |
| WSB2           | 4760.5  | 0.00198 | SMIM8         | 5297    | 0.00256 |
| CINP           | 4770.75 | 0.00198 | hsa-mir-101-1 | 5315.5  | 0.00258 |
| SLC16A3        | 4771.5  | 0.00198 | BRPF1         | 5317    | 0.00258 |

|              |         |         |              |         |         |
|--------------|---------|---------|--------------|---------|---------|
| MS4A14       | 4801.25 | 0.00200 | ICA1L        | 5325.75 | 0.00259 |
| C1orf194     | 4818.5  | 0.00201 | PRKRIP1      | 5331.5  | 0.00260 |
| CCDC93       | 4898.5  | 0.00207 | hsa-mir-4690 | 5346    | 0.00262 |
| OR5H6        | 4912.5  | 0.00208 | ROBO4        | 5349.25 | 0.00262 |
| STXBP4       | 4940    | 0.00210 | FOCAD        | 5426    | 0.00267 |
| CWF19L2      | 4942    | 0.00210 | DSG3         | 5446    | 0.00269 |
| PHF8         | 4944    | 0.00210 | CC2D1A       | 5450.5  | 0.00270 |
| DDHD2        | 4951.25 | 0.00211 | ZNF134       | 5455.25 | 0.00271 |
| ZNF665       | 4955.5  | 0.00212 | ATP11B       | 5460.75 | 0.00272 |
| MYRIP        | 4958.25 | 0.00212 | TMEM238      | 5515    | 0.00277 |
| ATP6VOC      | 4971.25 | 0.00213 | MARCKSL1     | 5533.25 | 0.00277 |
| MNS1         | 4990.5  | 0.00214 | WNT7A        | 5538.25 | 0.00278 |
| GATAD2A      | 4994.75 | 0.00214 | ZNF98        | 5589.5  | 0.00283 |
| C1orf111     | 5005.75 | 0.00216 | HAX1         | 5599.25 | 0.00285 |
| hsa-mir-6777 | 5024.75 | 0.00217 | PRKX         | 5607.25 | 0.00285 |
| PNMAL1       | 5095    | 0.00223 | SNX14        | 5691.75 | 0.00295 |
| OR1N2        | 5100    | 0.00224 | ZNF607       | 5719.75 | 0.00298 |
| IL12A        | 5131    | 0.00226 | FAHD1        | 5781.5  | 0.00306 |
| KRT24        | 5163.5  | 0.00228 | ZNF575       | 5787.5  | 0.00306 |
| CSF1         | 5193.75 | 0.00231 | CFP          | 5852.75 | 0.00312 |
| SMIM15       | 5199.25 | 0.00231 | ARHGAP40     | 5876.25 | 0.00314 |
| RNF135       | 5200.5  | 0.00231 | TSPYL6       | 5884.5  | 0.00314 |
| hsa-mir-142  | 5234.5  | 0.00234 | INSIG2       | 5924    | 0.00317 |
| C19orf67     | 5252.75 | 0.00235 | EFNB1        | 5935.5  | 0.00318 |
| NDNL2        | 5254.5  | 0.00235 | CCSAP        | 5977    | 0.00323 |
| PAK1IP1      | 5258.5  | 0.00235 | PKP4         | 5998.5  | 0.00325 |
| RPL7         | 5262.25 | 0.00236 | CNGA1        | 6005.75 | 0.00326 |
| GAGE10       | 5285.5  | 0.00237 | RAG2         | 6087.75 | 0.00334 |
| IDE          | 5287.75 | 0.00237 | KCNJ9        | 6121.5  | 0.00337 |
| CCDC101      | 5310.25 | 0.00240 | C9orf153     | 6127    | 0.00338 |
| TUBA3D       | 5315.5  | 0.00240 | FAF2         | 6142    | 0.00339 |
| DOK6         | 5356.25 | 0.00244 | AUH          | 6165.5  | 0.00343 |
| SPAST        | 5369.25 | 0.00245 | SLFN5        | 6166.25 | 0.00343 |
| ZNF175       | 5375.25 | 0.00245 | RNF130       | 6192.5  | 0.00346 |
| OR5M1        | 5415.25 | 0.00249 | FIZ1         | 6204    | 0.00348 |
| MYOCD        | 5450.5  | 0.00254 | HSCB         | 6212.75 | 0.00349 |
| CETN2        | 5521    | 0.00260 | SLC34A3      | 6227.5  | 0.00350 |
| NME6         | 5521.5  | 0.00260 | EOGT         | 6228.5  | 0.00351 |
| BUB1         | 5540.75 | 0.00261 | LDHA         | 6251    | 0.00352 |



|              |         |         |                 |         |         |
|--------------|---------|---------|-----------------|---------|---------|
| hsa-mir-3923 | 5555    | 0.00263 | ZC3H12C         | 6257    | 0.00353 |
| FASN         | 5593.25 | 0.00265 | AKIRIN1         | 6262    | 0.00354 |
| PITHD1       | 5595    | 0.00265 | IWS1            | 6288    | 0.00357 |
| RPS19        | 5622.25 | 0.00266 | TRAF5           | 6356    | 0.00366 |
| SYNGR3       | 5687.25 | 0.00272 | TMEM17          | 6371.5  | 0.00367 |
| hsa-mir-4421 | 5749.75 | 0.00278 | ARFIP2          | 6400.5  | 0.00370 |
| PPAPDC1A     | 5762.75 | 0.00280 | TOMM7           | 6401.5  | 0.00370 |
| LRMP         | 5770.25 | 0.00281 | hsa-mir-3689d-2 | 6415.25 | 0.00372 |
| ECI1         | 5785.75 | 0.00282 | PLEKHF1         | 6504.5  | 0.00382 |
| TCFL5        | 5790.25 | 0.00282 | SENP5           | 6525    | 0.00384 |
| ECHDC3       | 5811.75 | 0.00285 | MANSC1          | 6545    | 0.00386 |
| HCRTR1       | 5812.75 | 0.00285 | SERTAD2         | 6550.75 | 0.00387 |
| IST1         | 5838    | 0.00289 | MEX3D           | 6564    | 0.00388 |
| hsa-mir-6820 | 5860.5  | 0.00291 | CCDC42B         | 6579.75 | 0.00389 |
| hsa-mir-4448 | 5884    | 0.00294 | FAM104A         | 6580    | 0.00389 |
| TAF10        | 5896.5  | 0.00295 | POMP            | 6623.75 | 0.00395 |
| ATP5H        | 5975.75 | 0.00303 | LPGAT1          | 6642    | 0.00397 |
| SLC27A5      | 5982.25 | 0.00304 | SLC12A1         | 6649.5  | 0.00397 |
| TCP11X2      | 6038.75 | 0.00309 | hsa-mir-6749    | 6670.75 | 0.00399 |
| SOX10        | 6047.75 | 0.00310 | TBPL2           | 6676.75 | 0.00401 |
| SAC3D1       | 6055.75 | 0.00310 | SC5D            | 6690.5  | 0.00402 |
| TWF1         | 6063    | 0.00310 | NGEF            | 6695.5  | 0.00403 |
| DNAJC1       | 6099    | 0.00313 | MED22           | 6701.5  | 0.00404 |
| CAPN13       | 6116.5  | 0.00315 | MIDN            | 6701.5  | 0.00404 |
| AKAP1        | 6151.75 | 0.00320 | MPZL1           | 6706.25 | 0.00404 |
| CTGF         | 6206.5  | 0.00326 | WDR60           | 6738    | 0.00408 |
| SAP30BP      | 6221.5  | 0.00328 | FBXL15          | 6757.75 | 0.00409 |
| LBX1         | 6244.5  | 0.00329 | VRK3            | 6780    | 0.00413 |
| SYBU         | 6272.75 | 0.00332 | ITGA10          | 6786.5  | 0.00413 |
| LALBA        | 6309    | 0.00337 | MIER1           | 6806    | 0.00416 |
| NCAPH2       | 6311.75 | 0.00338 | DBI             | 6812.75 | 0.00417 |
| PBX1         | 6315.75 | 0.00339 | COG8            | 6826    | 0.00419 |
| HMGB1        | 6361    | 0.00344 | OR13H1          | 6840    | 0.00419 |
| hsa-mir-1249 | 6398    | 0.00350 | hsa-mir-5687    | 6869.5  | 0.00424 |
| hsa-mir-3173 | 6438.75 | 0.00353 | RPL22L1         | 6886.5  | 0.00426 |
| GIPC2        | 6450    | 0.00354 | KCNIP1          | 6887.75 | 0.00426 |
| TRIML1       | 6466.25 | 0.00357 | COPA            | 6897.75 | 0.00428 |
| YIPF6        | 6476.5  | 0.00358 | ZNF549          | 6916.75 | 0.00430 |
| C9orf3       | 6513    | 0.00361 | NKX2-2          | 7036    | 0.00448 |

|                                           |         |         |                                           |         |         |
|-------------------------------------------|---------|---------|-------------------------------------------|---------|---------|
| hsa-mir-215                               | 6532.75 | 0.00364 | WDR45B                                    | 7064.25 | 0.00450 |
| ATPAF1                                    | 6537.5  | 0.00365 | CYP4F2                                    | 7078.25 | 0.00453 |
| hsa-mir-5591                              | 6585.25 | 0.00371 | hsa-mir-6165                              | 7106.75 | 0.00456 |
| hsa-mir-4443                              | 6595.25 | 0.00372 | BSC12                                     | 7107.25 | 0.00456 |
| ACADSB                                    | 6607.5  | 0.00373 | SLC25A25                                  | 7179.75 | 0.00464 |
| C11orf48                                  | 6650.75 | 0.00379 | LARP6                                     | 7231.75 | 0.00471 |
| C11orf71                                  | 6699.25 | 0.00383 | CTNND2                                    | 7241.25 | 0.00473 |
| hsa-mir-583                               | 6735.75 | 0.00386 | CAV2                                      | 7244.5  | 0.00473 |
| BAG3                                      | 6743    | 0.00387 | PIGM                                      | 7273.75 | 0.00475 |
| hsa-mir-661                               | 6754.5  | 0.00388 | ESD                                       | 7284.25 | 0.00477 |
| TPM4                                      | 6768.75 | 0.00389 | JAM2                                      | 7310.5  | 0.00479 |
| TMPRSS11D                                 | 6801    | 0.00394 | MECOM                                     | 7321.25 | 0.00481 |
| C1orf185                                  | 6806.25 | 0.00394 | GRIA2                                     | 7335.75 | 0.00482 |
| hsa-mir-6743                              | 6824    | 0.00396 | FAM63B                                    | 7339.75 | 0.00482 |
| C16orf70                                  | 6841    | 0.00400 | WDR18                                     | 7346.75 | 0.00483 |
| ZNF24                                     | 6843.25 | 0.00400 | SRSF10                                    | 7362.75 | 0.00485 |
| ARHGAP24                                  | 6850.25 | 0.00400 | BIK                                       | 7364.75 | 0.00486 |
| HECW1                                     | 6869.75 | 0.00402 | CAPN12                                    | 7384.75 | 0.00489 |
| SLC39A12                                  | 6894.75 | 0.00405 | WDR44                                     | 7405.5  | 0.00492 |
| OSBPL3                                    | 6949    | 0.00411 | C11orf54                                  | 7444.5  | 0.00496 |
| hsa-mir-3163                              | 6961.75 | 0.00413 | FARSB                                     | 7446    | 0.00496 |
| PIGX                                      | 6969.25 | 0.00414 | hsa-mir-4419a                             | 7473    | 0.00501 |
| ERCC4                                     | 6982.75 | 0.00416 | SEMA7A                                    | 7488.75 | 0.00502 |
| PITPNM1                                   | 7029.25 | 0.00421 | ZNF416                                    | 7600.5  | 0.00520 |
| MILR1                                     | 7114    | 0.00433 | WNT6                                      | 7607.75 | 0.00520 |
| AAK1                                      | 7194    | 0.00442 | NonTargetingControlGuideForHuman_081<br>1 | 7615.75 | 0.00522 |
| PRSS55                                    | 7202    | 0.00444 | ELOVL4                                    | 7634.75 | 0.00525 |
| MBP                                       | 7217    | 0.00446 | MEIG1                                     | 7648.75 | 0.00527 |
| TEX37                                     | 7221.75 | 0.00446 | OLA1                                      | 7678.75 | 0.00529 |
| LARS2                                     | 7242.75 | 0.00447 | HSBP1L1                                   | 7695    | 0.00531 |
| LYSMD4                                    | 7270.5  | 0.00449 | ZMAT3                                     | 7709.25 | 0.00532 |
| NonTargetingControlGuideForHuman_062<br>5 | 7285.25 | 0.00451 | ATRNL1                                    | 7734.5  | 0.00536 |
| BIRC6                                     | 7287.5  | 0.00451 | FAM3B                                     | 7768.5  | 0.00540 |
| hsa-mir-378d-1                            | 7300.75 | 0.00453 | CLEC2B                                    | 7777.75 | 0.00541 |
| F10                                       | 7317.25 | 0.00455 | CCL4L2                                    | 7781.75 | 0.00542 |
| SPATA31A6                                 | 7334    | 0.00457 | SFTA3                                     | 7789.5  | 0.00544 |
| FXD2                                      | 7335    | 0.00457 | ANXA1                                     | 7845    | 0.00550 |
| hsa-mir-744                               | 7353.25 | 0.00460 | PLK5                                      | 7871    | 0.00553 |
| EGR2                                      | 7373.25 | 0.00462 | ARPP19                                    | 7877.75 | 0.00554 |

|                                       |         |         |             |         |         |
|---------------------------------------|---------|---------|-------------|---------|---------|
| FRS2                                  | 7430.25 | 0.00470 | ZNF556      | 7888.25 | 0.00555 |
| ZNF556                                | 7474    | 0.00476 | CHMP2B      | 7932.5  | 0.00561 |
| CLMN                                  | 7507    | 0.00481 | ARHGAP20    | 7952.5  | 0.00564 |
| KLHL36                                | 7512    | 0.00482 | KBTBD13     | 8036    | 0.00577 |
| OR2F2                                 | 7551.25 | 0.00489 | CREB3L2     | 8058.5  | 0.00581 |
| NAA25                                 | 7614    | 0.00498 | ZNF654      | 8067    | 0.00582 |
| GRK7                                  | 7624.5  | 0.00500 | SPACA1      | 8085    | 0.00584 |
| DOCK1                                 | 7626.5  | 0.00500 | CXXC1       | 8101.75 | 0.00587 |
| USP37                                 | 7635.75 | 0.00500 | ZNF322      | 8121.5  | 0.00590 |
| ZNF329                                | 7637.5  | 0.00501 | SKA3        | 8184.5  | 0.00599 |
| LDHB                                  | 7638.25 | 0.00501 | FSD1        | 8239.75 | 0.00605 |
| ARL4A                                 | 7680.75 | 0.00506 | TSG101      | 8264.5  | 0.00608 |
| DVL2                                  | 7756.75 | 0.00516 | hsa-mir-346 | 8269.25 | 0.00608 |
| HMX1                                  | 7762.75 | 0.00517 | SLC44A5     | 8294    | 0.00613 |
| RNF186                                | 7781.25 | 0.00520 | SERHL2      | 8295    | 0.00613 |
| hsa-mir-6845                          | 7802.75 | 0.00523 | DUS3L       | 8301.75 | 0.00613 |
| NPPB                                  | 7803.75 | 0.00524 | HOXA11      | 8362.5  | 0.00621 |
| NonTargetingControlGuideForHuman_0582 | 7827.25 | 0.00526 | PCMT1       | 8368.75 | 0.00622 |
| ADAM33                                | 7846.25 | 0.00528 | PTER        | 8397.5  | 0.00626 |
| SETD9                                 | 7857.25 | 0.00529 | XRCC2       | 8462.25 | 0.00639 |
| YPEL1                                 | 7864.25 | 0.00531 | MOSPD2      | 8493.25 | 0.00642 |
| COPS8                                 | 7924.75 | 0.00538 | SI          | 8494.75 | 0.00642 |
| DYDC2                                 | 7957    | 0.00540 | WIZ         | 8511.5  | 0.00644 |
| RNF13                                 | 8064.5  | 0.00556 | CISD3       | 8549.75 | 0.00649 |
| SLC25A25                              | 8076.25 | 0.00558 | DEFB125     | 8567.5  | 0.00651 |
| OTUD6A                                | 8087    | 0.00560 | TMEM185B    | 8571.5  | 0.00651 |
| ITGAV                                 | 8093    | 0.00560 | SLC23A3     | 8603.25 | 0.00655 |
| CNTFR                                 | 8126    | 0.00564 | TDG         | 8653    | 0.00661 |
| SNRPD2                                | 8135    | 0.00566 | TSGA13      | 8655    | 0.00661 |
| NPS                                   | 8148.5  | 0.00568 | NDUFA3      | 8679.25 | 0.00664 |
| LAMTOR1                               | 8189.5  | 0.00575 | PRCP        | 8751.25 | 0.00675 |
| CD200R1L                              | 8203.5  | 0.00576 | ZDHHC16     | 8774    | 0.00679 |
| XPO4                                  | 8223.5  | 0.00578 | AKTIP       | 8792.75 | 0.00681 |
| AXIN1                                 | 8229.75 | 0.00580 | SLC30A3     | 8840.25 | 0.00690 |
| PLA2G7                                | 8273.75 | 0.00586 | FSIP2       | 8859    | 0.00692 |
| RPP40                                 | 8311.5  | 0.00592 | SP6         | 8909.5  | 0.00700 |
| KRTAP5-7                              | 8392.25 | 0.00604 | SRSF3       | 8910.25 | 0.00700 |
| CD160                                 | 8425.5  | 0.00608 | CDC37       | 8921.75 | 0.00701 |
| SRPX2                                 | 8480    | 0.00616 | HGD         | 8922    | 0.00701 |

|                                       |         |         |              |         |         |
|---------------------------------------|---------|---------|--------------|---------|---------|
| ZNF586                                | 8492    | 0.00617 | SLC7A6OS     | 8946    | 0.00706 |
| HTATIP2                               | 8501    | 0.00620 | WFDC12       | 9044.75 | 0.00721 |
| SLC25A38                              | 8548.25 | 0.00627 | GPRC5B       | 9050.75 | 0.00722 |
| CCDC66                                | 8565.25 | 0.00630 | ECM2         | 9091.75 | 0.00729 |
| TSR2                                  | 8594.25 | 0.00633 | IL1R2        | 9118.75 | 0.00733 |
| ASGR1                                 | 8604.25 | 0.00634 | FEN1         | 9131.25 | 0.00733 |
| MDN1                                  | 8667.25 | 0.00644 | BAG5         | 9217    | 0.00745 |
| POLR3C                                | 8685    | 0.00644 | MSANTD1      | 9222.5  | 0.00745 |
| GPHB5                                 | 8697.25 | 0.00646 | GTF2H1       | 9223.25 | 0.00745 |
| TSPYL2                                | 8714    | 0.00647 | hsa-mir-4292 | 9233.75 | 0.00747 |
| PPA2                                  | 8740    | 0.00651 | RWDD2B       | 9247.5  | 0.00750 |
| NonTargetingControlGuideForHuman_0258 | 8741.5  | 0.00651 | SLC25A28     | 9271.75 | 0.00754 |
| RNF5                                  | 8759.75 | 0.00654 | MAPK13       | 9278.25 | 0.00755 |
| OR10J5                                | 8809.5  | 0.00663 | hsa-mir-2861 | 9335.75 | 0.00764 |
| hsa-mir-4697                          | 8810.25 | 0.00663 | APAF1        | 9339.75 | 0.00765 |
| TRAPPC2L                              | 8843.5  | 0.00670 | OR2A14       | 9339.75 | 0.00765 |
| SPATS2                                | 8851.5  | 0.00670 | BOD1         | 9341    | 0.00765 |
| EPRS                                  | 8874.75 | 0.00672 | GLI1         | 9401    | 0.00774 |
| CTSK                                  | 8886.5  | 0.00674 | KRTAP5-3     | 9401.5  | 0.00774 |
| ISCU                                  | 8926.25 | 0.00680 | FKBPL        | 9403.5  | 0.00775 |
| SLC30A6                               | 8941.25 | 0.00681 | TMEM57       | 9428.25 | 0.00778 |
| SEMA3E                                | 8986.5  | 0.00688 | NPAT         | 9437.5  | 0.00780 |
| GUCY1A3                               | 9024.75 | 0.00695 | NEK8         | 9494.25 | 0.00789 |
| NonTargetingControlGuideForHuman_0042 | 9069.5  | 0.00703 | TROAP        | 9505.75 | 0.00791 |
| hsa-mir-4755                          | 9184.25 | 0.00722 | RPS16        | 9529.5  | 0.00794 |
| OR52H1                                | 9206    | 0.00727 | NUDT8        | 9556    | 0.00799 |
| FAM206A                               | 9206.5  | 0.00727 | CD300LD      | 9559    | 0.00799 |
| APCDD1                                | 9233.25 | 0.00732 | C10orf99     | 9561.5  | 0.00800 |
| hsa-mir-3915                          | 9233.5  | 0.00732 | TXLNB        | 9576    | 0.00803 |
| DNAJB5                                | 9313.75 | 0.00744 | TUBB4B       | 9588.25 | 0.00805 |
| HENMT1                                | 9345.75 | 0.00749 | CRYBA4       | 9646.75 | 0.00816 |
| NUDC                                  | 9406.5  | 0.00759 | GIMAP2       | 9703    | 0.00824 |
| CHMP6                                 | 9427.25 | 0.00762 | OR10J3       | 9765.5  | 0.00834 |
| MTMR6                                 | 9429    | 0.00763 | CLDN2        | 9773.25 | 0.00835 |
| TACC1                                 | 9499.75 | 0.00772 | SEBOX        | 9781    | 0.00837 |
| KARS                                  | 9516    | 0.00774 | MTRNR2L2     | 9809.25 | 0.00843 |
| FTSJD1                                | 9522.25 | 0.00775 | C1orf86      | 9861.5  | 0.00853 |
| MEGF10                                | 9523    | 0.00775 | RNF180       | 9883.25 | 0.00856 |
| IGLON5                                | 9556.5  | 0.00781 | KIAA1429     | 9886.25 | 0.00856 |

|                 |              |         |                                           |              |         |
|-----------------|--------------|---------|-------------------------------------------|--------------|---------|
| ATP6V0A1        | 9624.25      | 0.00790 | NUP85                                     | 9913.5       | 0.00860 |
| hsa-mir-5586    | 9640.75      | 0.00794 | hsa-mir-1285-2                            | 9915.75      | 0.00860 |
| MTRR            | 9743.5       | 0.00810 | USP25                                     | 9940.5       | 0.00865 |
| PLEKHM3         | 9757.75      | 0.00811 | CCDC88A                                   | 9941.5       | 0.00865 |
| TAS2R40         | 9764.25      | 0.00813 | TBCA                                      | 9942.25      | 0.00865 |
| CDK12           | 9773.25      | 0.00815 | DNAJB6                                    | 10016        | 0.00881 |
| PPME1           | 9839         | 0.00828 | CUL3                                      | 10043.7<br>5 | 0.00886 |
| GATAD2B         | 9852.75      | 0.00830 | ACTR10                                    | 10070.2<br>5 | 0.00889 |
| OTUD7B          | 9864.25      | 0.00832 | NonTargetingControlGuideForHuman_049<br>1 | 10094        | 0.00893 |
| PPARD           | 9867.25      | 0.00832 | MTIF3                                     | 10096.7<br>5 | 0.00893 |
| EFCAB6          | 9869         | 0.00832 | HDHD2                                     | 10115.7<br>5 | 0.00895 |
| TMEM127         | 9875.25      | 0.00834 | LMAN1                                     | 10121        | 0.00896 |
| ANAPC16         | 9888.25      | 0.00836 | CHUK                                      | 10188        | 0.00908 |
| KRTAP9-9        | 9935.5       | 0.00847 | DDO                                       | 10205        | 0.00912 |
| PSMG1           | 9940.5       | 0.00848 | ZNF726                                    | 10229        | 0.00917 |
| ARRDC1          | 9993.75      | 0.00858 | SERPINB13                                 | 10256        | 0.00922 |
| hsa-mir-381     | 10037.7<br>5 | 0.00866 | MYH14                                     | 10355.5      | 0.00941 |
| hsa-mir-501     | 10044.2<br>5 | 0.00867 | ZHX2                                      | 10360.7<br>5 | 0.00942 |
| KDM2A           | 10099.2<br>5 | 0.00875 | MROH9                                     | 10371.5      | 0.00943 |
| RPL37           | 10103.5      | 0.00876 | ZNF639                                    | 10392.2<br>5 | 0.00949 |
| STOX1           | 10109.7<br>5 | 0.00877 | NR5A2                                     | 10413.7<br>5 | 0.00952 |
| PLAU            | 10121.5      | 0.00879 | FEZF1                                     | 10422.5      | 0.00954 |
| GADD45G         | 10137.5      | 0.00883 | BTG4                                      | 10429        | 0.00956 |
| SYF2            | 10152.7<br>5 | 0.00886 | FN1                                       | 10461.2<br>5 | 0.00961 |
| TAS2R4          | 10236.2<br>5 | 0.00899 | CKMT2                                     | 10488        | 0.00966 |
| XPO6            | 10241.2<br>5 | 0.00899 | PARN                                      | 10541.7<br>5 | 0.00977 |
| HOXB4           | 10264.7<br>5 | 0.00904 | VDAC3                                     | 10548.2<br>5 | 0.00978 |
| CCNT1           | 10327        | 0.00916 | ZNF595                                    | 10582        | 0.00984 |
| ITGA3           | 10410.2<br>5 | 0.00930 | hsa-mir-150                               | 10594.2<br>5 | 0.00985 |
| ZNF689          | 10438        | 0.00934 | WDR37                                     | 10596.2<br>5 | 0.00986 |
| COL4A3BP        | 10498.5      | 0.00945 | RBP5                                      | 10711.7<br>5 | 0.01004 |
| ARGLU1          | 10498.7<br>5 | 0.00945 | CKLF                                      | 10734.5      | 0.01010 |
| NPM3            | 10539        | 0.00952 | DHFR                                      | 10814.2<br>5 | 0.01025 |
| PAH             | 10543.7<br>5 | 0.00952 | HERC2                                     | 10886.7<br>5 | 0.01037 |
| hsa-mir-4436b-2 | 10566        | 0.00956 | TMEM216                                   | 10903        | 0.01040 |
| QSOX1           | 10572.7<br>5 | 0.00958 | CHERP                                     | 10936.7<br>5 | 0.01046 |
| CCDC127         | 10607.2<br>5 | 0.00965 | DPM1                                      | 10940        | 0.01047 |

|              |              |         |                 |              |         |
|--------------|--------------|---------|-----------------|--------------|---------|
| SPATA3       | 10630.7<br>5 | 0.00969 | PKDREJ          | 10948        | 0.01049 |
| F11R         | 10657.5      | 0.00974 | EN2             | 10958.5      | 0.01050 |
| MUC15        | 10696.2<br>5 | 0.00981 | ZNF776          | 10960        | 0.01051 |
| hsa-mir-6884 | 10701.2<br>5 | 0.00982 | SPRY1           | 10971        | 0.01053 |
| DDRKG1       | 10718.2<br>5 | 0.00985 | KCTD14          | 11012.5      | 0.01061 |
| ST8SIA3      | 10731        | 0.00988 | BCL3            | 11056        | 0.01068 |
| AR           | 10738        | 0.00988 | TNFSF12-TNFSF13 | 11104.7<br>5 | 0.01077 |
| VPS37A       | 10811        | 0.01003 | YIPF4           | 11110.2<br>5 | 0.01078 |
| CFH          | 10813.2<br>5 | 0.01003 | ZNF431          | 11112.7<br>5 | 0.01078 |
| ZRANB2       | 10842.2<br>5 | 0.01008 | NIP7            | 11210.5      | 0.01093 |
| VSTM1        | 10858.2<br>5 | 0.01011 | C3orf36         | 11239.7<br>5 | 0.01098 |
| PSG3         | 10873.5      | 0.01013 | KRT13           | 11240.2<br>5 | 0.01098 |
| BEST3        | 10896.2<br>5 | 0.01017 | NUDT13          | 11241.2<br>5 | 0.01098 |
| BANK1        | 10912.7<br>5 | 0.01020 | KIAA1211L       | 11259.5      | 0.01102 |
| TAL1         | 10915.7<br>5 | 0.01021 | KCNT2           | 11269.2<br>5 | 0.01103 |
| PET117       | 10943.5      | 0.01026 | FEV             | 11296.5      | 0.01109 |
| COMMD7       | 10988        | 0.01034 | TIMP1           | 11324.7<br>5 | 0.01115 |
| PVR          | 11021        | 0.01039 | DGKE            | 11376.7<br>5 | 0.01123 |
| LOC284385    | 11040.2<br>5 | 0.01042 | CHRNA3          | 11430.5      | 0.01134 |
| hsa-mir-6127 | 11047.2<br>5 | 0.01044 | ACSM4           | 11439.5      | 0.01136 |
| ATP6AP1      | 11097.7<br>5 | 0.01053 | POLR1A          | 11486.7<br>5 | 0.01145 |
| RPL30        | 11114.7<br>5 | 0.01058 | C1orf172        | 11486.7<br>5 | 0.01145 |
| GRIA2        | 11127.2<br>5 | 0.01060 | CLCC1           | 11501.7<br>5 | 0.01149 |
| SGCB         | 11152.2<br>5 | 0.01065 | IQCF3           | 11507.7<br>5 | 0.01150 |
| TMTC1        | 11199.5      | 0.01075 | MBOAT4          | 11512.7<br>5 | 0.01151 |
| SKA2         | 11218.2<br>5 | 0.01078 | ATF5            | 11518.7<br>5 | 0.01152 |
| RPLP2        | 11239.7<br>5 | 0.01083 | FSTL4           | 11552.2<br>5 | 0.01158 |
| BCAS1        | 11293.2<br>5 | 0.01094 | TMX4            | 11624.5      | 0.01173 |
| ACSM2A       | 11302.5      | 0.01096 | ANKS4B          | 11731.2<br>5 | 0.01194 |
| CENPF        | 11306.5      | 0.01097 | TRIM52          | 11736.5      | 0.01194 |
| ESD          | 11331.7<br>5 | 0.01103 | GABRQ           | 11738.7<br>5 | 0.01194 |
| THRAP3       | 11344        | 0.01105 | HRH4            | 11755.5      | 0.01197 |
| GARNL3       | 11375        | 0.01111 | LOC100506422    | 11784        | 0.01203 |
| EAF2         | 11511.7<br>5 | 0.01136 | LMOD3           | 11801.5      | 0.01208 |
| NDUFA8       | 11542.2<br>5 | 0.01141 | COG3            | 11887.2<br>5 | 0.01225 |
| CD180        | 11546.7<br>5 | 0.01141 | PPP2R5D         | 11930        | 0.01233 |
| KBTBD3       | 11560.5      | 0.01145 | SAE1            | 11937.5      | 0.01234 |

|                |              |         |              |              |         |
|----------------|--------------|---------|--------------|--------------|---------|
| CLCN7          | 11566.5      | 0.01146 | CLDN10       | 11939.5      | 0.01235 |
| PAX8           | 11585.7<br>5 | 0.01150 | SF3B4        | 11948.7<br>5 | 0.01238 |
| SLC16A9        | 11590        | 0.01152 | CFHR5        | 11960.2<br>5 | 0.01241 |
| hsa-mir-6863   | 11603.7<br>5 | 0.01155 | NGB          | 12013.5      | 0.01251 |
| UBE2V1         | 11612.2<br>5 | 0.01156 | TK2          | 12047.2<br>5 | 0.01258 |
| CRYBB3         | 11619.2<br>5 | 0.01157 | TMEM69       | 12099.2<br>5 | 0.01271 |
| DZIP1          | 11676.2<br>5 | 0.01168 | PDE1B        | 12113.5      | 0.01273 |
| NXPE3          | 11694.5      | 0.01171 | STRN4        | 12242.7<br>5 | 0.01302 |
| MINA           | 11719        | 0.01177 | ADARB2       | 12270.2<br>5 | 0.01309 |
| GDF10          | 11774.2<br>5 | 0.01191 | KRTAP9-4     | 12343.7<br>5 | 0.01326 |
| SPATA31A4      | 11804        | 0.01195 | HDGF         | 12365.7<br>5 | 0.01332 |
| DDX24          | 11812.5      | 0.01197 | RAB11FIP1    | 12380.5      | 0.01335 |
| TMEM251        | 11831        | 0.01201 | NR2F6        | 12403        | 0.01341 |
| hsa-mir-653    | 11900.7<br>5 | 0.01219 | SCGB1D1      | 12410        | 0.01342 |
| HKDC1          | 11949.2<br>5 | 0.01229 | LOC158434    | 12432        | 0.01345 |
| PPP2CA         | 11952.2<br>5 | 0.01229 | CHST1        | 12441        | 0.01346 |
| ATP1B4         | 11966.5      | 0.01233 | GDF11        | 12442.7<br>5 | 0.01346 |
| NEXN           | 11981.5      | 0.01237 | HHLA3        | 12467.2<br>5 | 0.01351 |
| CA7            | 12013.7<br>5 | 0.01242 | SRP54        | 12468.2<br>5 | 0.01352 |
| AAMP           | 12038.5      | 0.01248 | CWC25        | 12570.7<br>5 | 0.01370 |
| C12orf71       | 12204.7<br>5 | 0.01281 | COX6C        | 12604.5      | 0.01377 |
| CDC23          | 12222.2<br>5 | 0.01285 | ARHGAP19     | 12607.2<br>5 | 0.01379 |
| CTSO           | 12283.5      | 0.01300 | HSD11B2      | 12617.7<br>5 | 0.01381 |
| HGD            | 12288.2<br>5 | 0.01301 | AFMID        | 12631.7<br>5 | 0.01383 |
| hsa-mir-6516   | 12308.5      | 0.01306 | ACTR1A       | 12672.2<br>5 | 0.01390 |
| FITM1          | 12312.2<br>5 | 0.01307 | IQCH         | 12701.2<br>5 | 0.01396 |
| CRISP1         | 12326        | 0.01309 | CSNK1G1      | 12743.7<br>5 | 0.01403 |
| GCSAML         | 12333.2<br>5 | 0.01311 | SLC12A2      | 12843.5      | 0.01429 |
| PDDC1          | 12344.7<br>5 | 0.01312 | DUT          | 12849.2<br>5 | 0.01431 |
| VSIG8          | 12354.5      | 0.01314 | hsa-mir-4780 | 12850.2<br>5 | 0.01431 |
| GLTSCR1        | 12370.7<br>5 | 0.01317 | hsa-mir-3907 | 12905.5      | 0.01446 |
| DLG1           | 12372.2<br>5 | 0.01317 | KPNA3        | 12907.7<br>5 | 0.01446 |
| CCL24          | 12380.5      | 0.01319 | TBX20        | 12916.7<br>5 | 0.01449 |
| REN            | 12400.5      | 0.01322 | CFH          | 12922.2<br>5 | 0.01450 |
| hsa-mir-548a-1 | 12470.7<br>5 | 0.01337 | CDK3         | 12949.7<br>5 | 0.01456 |
| hsa-mir-4297   | 12478        | 0.01339 | COL10A1      | 12974.2<br>5 | 0.01463 |

|              |          |         |                                       |          |         |
|--------------|----------|---------|---------------------------------------|----------|---------|
| ADCY2        | 12520.25 | 0.01350 | TMEM27                                | 12997.25 | 0.01470 |
| HRASLS2      | 12522.75 | 0.01350 | OCIAD1                                | 13001.25 | 0.01471 |
| hsa-mir-3908 | 12532.5  | 0.01353 | SERTAD1                               | 13012.75 | 0.01473 |
| MANSC1       | 12550.25 | 0.01355 | INTS7                                 | 13023    | 0.01476 |
| PDF          | 12551.5  | 0.01356 | TOP3A                                 | 13109.75 | 0.01496 |
| POM121C      | 12560.75 | 0.01359 | KRT28                                 | 13123    | 0.01499 |
| BTBD17       | 12584.5  | 0.01363 | TMEM72                                | 13151.25 | 0.01506 |
| NUDT11       | 12616.25 | 0.01373 | ANXA6                                 | 13218.75 | 0.01522 |
| IL13RA1      | 12640.75 | 0.01377 | UNC45B                                | 13242    | 0.01527 |
| CCDC74A      | 12680.5  | 0.01385 | HLA-DRB1                              | 13259.25 | 0.01531 |
| GPATCH1      | 12723.5  | 0.01395 | MSL1                                  | 13319.5  | 0.01547 |
| PSMD6        | 12753.25 | 0.01405 | ACTA2                                 | 13322.25 | 0.01548 |
| MYOC         | 12758.75 | 0.01406 | ANO7                                  | 13326.25 | 0.01549 |
| MOB1A        | 12793.75 | 0.01413 | CXCL10                                | 13376.25 | 0.01560 |
| PCDHGB3      | 12818.75 | 0.01419 | TNFRSF9                               | 13417.75 | 0.01571 |
| ATP8A1       | 12842    | 0.01426 | FIBIN                                 | 13423.5  | 0.01573 |
| hsa-mir-600  | 12843.75 | 0.01426 | CHIA                                  | 13435    | 0.01576 |
| SCAF11       | 12852.25 | 0.01428 | CRADD                                 | 13440.5  | 0.01578 |
| ZFP90        | 12874.5  | 0.01433 | KRT33A                                | 13442.75 | 0.01578 |
| MRPL35       | 12881.75 | 0.01435 | DKC1                                  | 13462.5  | 0.01581 |
| hsa-mir-4499 | 12931.5  | 0.01446 | NonTargetingControlGuideForHuman_0147 | 13495.5  | 0.01588 |
| ABCA8        | 12939.5  | 0.01449 | CDHR5                                 | 13510.5  | 0.01592 |
| SOX14        | 12949.25 | 0.01451 | KCNAB2                                | 13528.75 | 0.01598 |
| FBXL15       | 12965.75 | 0.01456 | HSF2                                  | 13539.25 | 0.01600 |
| IFI27L2      | 13067    | 0.01480 | CBX4                                  | 13586.5  | 0.01612 |
| SRFBP1       | 13082.75 | 0.01484 | hsa-mir-378c                          | 13593.75 | 0.01614 |
| FAM76B       | 13099.75 | 0.01487 | KRTAP9-9                              | 13602.75 | 0.01616 |
| TMIE         | 13137    | 0.01496 | DMRTB1                                | 13615.75 | 0.01620 |
| FKBP4        | 13192.75 | 0.01509 | GK5                                   | 13643    | 0.01626 |
| CSRP2BP      | 13199.5  | 0.01511 | ODF2L                                 | 13668.75 | 0.01630 |
| TNRC6C       | 13202    | 0.01512 | EIF3B                                 | 13674.75 | 0.01631 |
| RPL24        | 13319    | 0.01539 | hsa-mir-23a                           | 13677    | 0.01631 |
| VASP         | 13340.75 | 0.01542 | SNPH                                  | 13679.25 | 0.01632 |
| RAI2         | 13345.25 | 0.01543 | hsa-mir-8076                          | 13692.75 | 0.01634 |
| ARSD         | 13357.75 | 0.01546 | HARS2                                 | 13694.25 | 0.01634 |
| RPS8         | 13362.5  | 0.01547 | POLI                                  | 13742.5  | 0.01645 |
| hsa-mir-548s | 13389.5  | 0.01553 | C7orf73                               | 13753    | 0.01646 |



|              |              |         |              |              |         |
|--------------|--------------|---------|--------------|--------------|---------|
| PINLYP       | 13390.7<br>5 | 0.01553 | YLPM1        | 13862.2<br>5 | 0.01673 |
| FTMT         | 13394.2<br>5 | 0.01554 | FGF23        | 13876.7<br>5 | 0.01676 |
| KIAA1211L    | 13443.2<br>5 | 0.01564 | TAS2R46      | 13877        | 0.01676 |
| ATG4A        | 13488        | 0.01573 | MFN2         | 13923.7<br>5 | 0.01689 |
| SDAD1        | 13511.2<br>5 | 0.01579 | TOX2         | 13955        | 0.01697 |
| FAM131A      | 13607.7<br>5 | 0.01599 | PJA2         | 13958.7<br>5 | 0.01698 |
| COPS6        | 13624        | 0.01601 | SART3        | 13976.2<br>5 | 0.01701 |
| hsa-mir-1277 | 13646.5      | 0.01607 | SOX21        | 13981.2<br>5 | 0.01703 |
| LOC100996485 | 13674.5      | 0.01611 | TCEB1        | 13992.7<br>5 | 0.01704 |
| PPP2R5D      | 13705        | 0.01619 | hsa-mir-4686 | 14031.7<br>5 | 0.01714 |
| PSMB3        | 13829.2<br>5 | 0.01648 | CCDC92       | 14062.2<br>5 | 0.01721 |
| SNX1         | 13864.2<br>5 | 0.01655 | TRIM27       | 14086.7<br>5 | 0.01727 |
| TXNL4A       | 13873        | 0.01657 | FTSJ1        | 14107.7<br>5 | 0.01732 |
| ROPN1        | 13901.7<br>5 | 0.01665 | OSBPL8       | 14135.7<br>5 | 0.01741 |
| C14orf119    | 13958.2<br>5 | 0.01679 | OR52I1       | 14144        | 0.01743 |
| C15orf61     | 13996.7<br>5 | 0.01689 | NUDC         | 14149.5      | 0.01745 |
| ADAMT5       | 14040.2<br>5 | 0.01699 | DKK1         | 14185        | 0.01754 |
| HIBADH       | 14051.5      | 0.01701 | BLNK         | 14220.7<br>5 | 0.01763 |
| SLITRK2      | 14061.5      | 0.01704 | CCDC71L      | 14252.2<br>5 | 0.01771 |
| CLDN5        | 14076.5      | 0.01707 | FAM46C       | 14256.7<br>5 | 0.01772 |
| C17orf97     | 14161.7<br>5 | 0.01726 | TMC05A       | 14263.2<br>5 | 0.01774 |
| DNAJB3       | 14172.7<br>5 | 0.01728 | RPS6KA2      | 14264.5      | 0.01774 |
| AMER3        | 14246.2<br>5 | 0.01745 | SLC26A1      | 14321.5      | 0.01789 |
| PRPF4B       | 14255.5      | 0.01748 | MYBL2        | 14353.5      | 0.01795 |
| AK5          | 14265.5      | 0.01750 | C7orf61      | 14423.5      | 0.01812 |
| IDS          | 14287.5      | 0.01756 | RPS2         | 14424        | 0.01812 |
| MAOB         | 14307.2<br>5 | 0.01761 | HPS3         | 14496.5      | 0.01832 |
| ALKBH5       | 14326.5      | 0.01764 | CYP17A1      | 14505.7<br>5 | 0.01834 |
| STAT1        | 14345.7<br>5 | 0.01769 | XAGE2        | 14605.2<br>5 | 0.01856 |
| hsa-mir-6727 | 14362.2<br>5 | 0.01773 | hsa-mir-198  | 14621        | 0.01859 |
| IPMK         | 14366.5      | 0.01775 | OR2T5        | 14634.2<br>5 | 0.01864 |
| YBX3         | 14375.7<br>5 | 0.01777 | RBM20        | 14647.5      | 0.01869 |
| PLCL1        | 14419        | 0.01790 | GULP1        | 14681.2<br>5 | 0.01876 |
| hsa-mir-4280 | 14443        | 0.01796 | SETX         | 14708.2<br>5 | 0.01881 |
| CSNK2B       | 14446.5      | 0.01797 | hsa-mir-18b  | 14708.7<br>5 | 0.01881 |
| DHDH         | 14462        | 0.01799 | CLGN         | 14768        | 0.01896 |
| ATP10B       | 14467.7<br>5 | 0.01800 | TBK1         | 14789.5      | 0.01901 |

|              |              |         |             |              |         |
|--------------|--------------|---------|-------------|--------------|---------|
| MTX1         | 14483.2<br>5 | 0.01804 | CACTIN      | 14830.2<br>5 | 0.01910 |
| BPIFA2       | 14518.5      | 0.01812 | ZNF280C     | 14876.2<br>5 | 0.01922 |
| hsa-mir-8086 | 14546        | 0.01820 | PRDX1       | 14937.5      | 0.01941 |
| TEAD2        | 14561.2<br>5 | 0.01824 | ARHGEF5     | 14966.7<br>5 | 0.01949 |
| NKX2-1       | 14584.5      | 0.01831 | TMC1        | 15052.5      | 0.01974 |
| GPR110       | 14605.5      | 0.01837 | POLM        | 15073.2<br>5 | 0.01979 |
| GCGR         | 14606        | 0.01837 | SH3BP1      | 15080.5      | 0.01981 |
| hsa-mir-580  | 14618.5      | 0.01841 | PHF20       | 15129        | 0.01994 |
| CSTF2        | 14660.5      | 0.01850 | DPM2        | 15139.7<br>5 | 0.01997 |
| ADD3         | 14682.7<br>5 | 0.01857 | SCGB1D2     | 15154        | 0.02000 |
| OTUD4        | 14688.5      | 0.01858 | FXN         | 15175.7<br>5 | 0.02007 |
| ZNF365       | 14719        | 0.01869 | WDR92       | 15196        | 0.02013 |
| LPGAT1       | 14738        | 0.01872 | KIAA0825    | 15242.5      | 0.02026 |
| FOLR3        | 14776.5      | 0.01883 | CD300A      | 15347.5      | 0.02050 |
| CNKSR3       | 14785.5      | 0.01885 | GBX1        | 15399        | 0.02063 |
| AKT1S1       | 14846        | 0.01901 | hsa-mir-621 | 15408.2<br>5 | 0.02065 |
| GUCA2A       | 14859.2<br>5 | 0.01904 | NCF2        | 15464.2<br>5 | 0.02078 |
| CD5L         | 14946        | 0.01927 | CDH11       | 15609        | 0.02118 |
| DOCK5        | 14948.7<br>5 | 0.01928 | TMEM52      | 15644.5      | 0.02130 |
| NTF3         | 14982.2<br>5 | 0.01939 | DPH2        | 15651.5      | 0.02131 |
| NUDCD2       | 14989.5      | 0.01940 | DIRAS2      | 15651.5      | 0.02131 |
| ZNF202       | 15075        | 0.01965 | THAP1       | 15660.2<br>5 | 0.02133 |
| C9orf153     | 15078.2<br>5 | 0.01966 | POLR2E      | 15702.7<br>5 | 0.02144 |
| MCSR         | 15136.5      | 0.01980 | C16orf97    | 15702.7<br>5 | 0.02144 |
| OR10A3       | 15232        | 0.02006 | SMCHD1      | 15704.7<br>5 | 0.02144 |
| MRPL1        | 15247.7<br>5 | 0.02009 | SLC4A8      | 15764.2<br>5 | 0.02160 |
| CLEC4E       | 15261        | 0.02012 | STX17       | 15817.7<br>5 | 0.02176 |
| ATF3         | 15262        | 0.02013 | HEATR5B     | 15858.7<br>5 | 0.02188 |
| hsa-mir-5096 | 15378.2<br>5 | 0.02047 | RPS23       | 15859        | 0.02188 |
| MAB21L1      | 15415.7<br>5 | 0.02058 | PTN         | 15879.7<br>5 | 0.02194 |
| EPS8         | 15417.2<br>5 | 0.02058 | NDUF6F6     | 15907        | 0.02201 |
| CHSY1        | 15429.2<br>5 | 0.02061 | MYLK4       | 15914.5      | 0.02203 |
| CATSPERG     | 15454.5      | 0.02068 | CDC42EP3    | 15944.2<br>5 | 0.02211 |
| PYROXD2      | 15457        | 0.02069 | TFCP2L1     | 15975.7<br>5 | 0.02220 |
| MYADML2      | 15459        | 0.02069 | NDUFC1      | 16023        | 0.02234 |
| hsa-mir-6129 | 15514.5      | 0.02084 | MEMO1       | 16064.5      | 0.02249 |
| USP7         | 15520.7<br>5 | 0.02086 | RBM48       | 16072        | 0.02250 |

|              |              |         |                                           |              |         |
|--------------|--------------|---------|-------------------------------------------|--------------|---------|
| OTC          | 15526.5      | 0.02088 | BCCIP                                     | 16093.5      | 0.02255 |
| NOC2L        | 15607.5      | 0.02111 | EXOSC8                                    | 16110.7<br>5 | 0.02260 |
| C17orf80     | 15619        | 0.02114 | NonTargetingControlGuideForHuman_071<br>7 | 16135        | 0.02266 |
| TIMM21       | 15672.2<br>5 | 0.02130 | OR8U1                                     | 16144.7<br>5 | 0.02268 |
| IFNA8        | 15761.7<br>5 | 0.02158 | EAF1                                      | 16212.7<br>5 | 0.02292 |
| ALDH3B1      | 15820        | 0.02174 | MOBP                                      | 16275.2<br>5 | 0.02307 |
| OR7A10       | 15863.5      | 0.02187 | GABRE                                     | 16283.2<br>5 | 0.02310 |
| NT5E         | 15869.7<br>5 | 0.02188 | TPM2                                      | 16300        | 0.02315 |
| CNOT3        | 15913.7<br>5 | 0.02198 | THRAP3                                    | 16373        | 0.02336 |
| SIX5         | 15920.2<br>5 | 0.02200 | TMF1                                      | 16388        | 0.02338 |
| CALCR        | 15927        | 0.02201 | MDH1                                      | 16480.2<br>5 | 0.02367 |
| NAALAD2      | 15936        | 0.02204 | FLYWCH1                                   | 16509.2<br>5 | 0.02374 |
| ZNF430       | 16020.5      | 0.02226 | KCNJ4                                     | 16571.5      | 0.02389 |
| hsa-mir-626  | 16027.7<br>5 | 0.02229 | TMPRSS11D                                 | 16625        | 0.02402 |
| ZNF225       | 16055        | 0.02235 | CCL18                                     | 16635.5      | 0.02407 |
| CELA3A       | 16067.7<br>5 | 0.02239 | DEDD2                                     | 16747        | 0.02436 |
| C11orf35     | 16087.2<br>5 | 0.02243 | PDK1                                      | 16774.2<br>5 | 0.02444 |
| PRKAR1A      | 16119.5      | 0.02251 | ZNF704                                    | 16806        | 0.02454 |
| POLR2K       | 16126        | 0.02253 | PIK3R6                                    | 16860.7<br>5 | 0.02470 |
| ULK4         | 16134.2<br>5 | 0.02255 | hsa-mir-633                               | 16869        | 0.02472 |
| C5orf47      | 16135.7<br>5 | 0.02255 | ENDOD1                                    | 16873.2<br>5 | 0.02473 |
| ZFP36        | 16140.7<br>5 | 0.02257 | hsa-mir-4766                              | 16890        | 0.02478 |
| PROKR1       | 16151.7<br>5 | 0.02259 | PXK                                       | 16920        | 0.02488 |
| EMCN         | 16162        | 0.02261 | FAM178A                                   | 16954.5      | 0.02500 |
| MTRNR2L5     | 16171.7<br>5 | 0.02266 | ABCC4                                     | 16970        | 0.02506 |
| NFX1         | 16191.5      | 0.02272 | NADK                                      | 16982        | 0.02509 |
| OR10J1       | 16223.5      | 0.02280 | CPEB3                                     | 16983        | 0.02509 |
| CAPNS2       | 16326.5      | 0.02313 | MAGEH1                                    | 16986.2<br>5 | 0.02510 |
| EPHA6        | 16337        | 0.02316 | ALG10B                                    | 16987.2<br>5 | 0.02510 |
| OAF          | 16383.2<br>5 | 0.02330 | ANAPC4                                    | 16996.2<br>5 | 0.02512 |
| GSTM1        | 16389        | 0.02332 | CTDSPL                                    | 17011.5      | 0.02516 |
| ENDOD1       | 16411.2<br>5 | 0.02339 | TNFSF12                                   | 17054.2<br>5 | 0.02528 |
| hsa-mir-125a | 16411.5      | 0.02339 | NFIC                                      | 17123.7<br>5 | 0.02552 |
| MTF1         | 16411.5      | 0.02339 | OR6K2                                     | 17138.2<br>5 | 0.02556 |
| SIAH2        | 16489.5      | 0.02362 | GP6                                       | 17169.5      | 0.02565 |
| MEST         | 16584        | 0.02392 | FAM9A                                     | 17236.7<br>5 | 0.02583 |
| KIAA0319L    | 16588        | 0.02394 | hsa-mir-330                               | 17253.2<br>5 | 0.02586 |

|                |              |         |           |              |         |
|----------------|--------------|---------|-----------|--------------|---------|
| TSPAN5         | 16612.5      | 0.02401 | UBE2D2    | 17286        | 0.02591 |
| LGALS8         | 16630.7<br>5 | 0.02408 | TMEM74    | 17297        | 0.02595 |
| OR6C3          | 16657.2<br>5 | 0.02416 | BTF3      | 17416.7<br>5 | 0.02635 |
| hsa-mir-2467   | 16672.5      | 0.02421 | TUBA1B    | 17455.2<br>5 | 0.02647 |
| MTSS1L         | 16705.5      | 0.02432 | TYK2      | 17483        | 0.02656 |
| LRRCS9         | 16755.5      | 0.02446 | CLEC1A    | 17505.2<br>5 | 0.02662 |
| FGF22          | 16907.5      | 0.02492 | ZNF730    | 17539.7<br>5 | 0.02674 |
| APOBEC3B       | 16950.2<br>5 | 0.02503 | SLC5A2    | 17554        | 0.02677 |
| EMR1           | 16951.2<br>5 | 0.02504 | ENHO      | 17563.2<br>5 | 0.02680 |
| ZSCAN25        | 16972.2<br>5 | 0.02509 | HIST1H2BH | 17598.2<br>5 | 0.02690 |
| ZNF514         | 17025        | 0.02524 | SCEL      | 17622.5      | 0.02696 |
| MUCL1          | 17105        | 0.02549 | HOXB8     | 17684.7<br>5 | 0.02717 |
| RIMKLB         | 17145.2<br>5 | 0.02560 | FGD3      | 17706.2<br>5 | 0.02723 |
| FAM229B        | 17199.7<br>5 | 0.02576 | WDR45     | 17709.2<br>5 | 0.02724 |
| OR10H5         | 17238        | 0.02587 | PSD3      | 17777.7<br>5 | 0.02745 |
| OR4C45         | 17264.7<br>5 | 0.02597 | BRD4      | 17785.5      | 0.02748 |
| AK7            | 17264.7<br>5 | 0.02597 | POU5F2    | 17859.5      | 0.02770 |
| PLEKHG7        | 17268.7<br>5 | 0.02598 | KRTAP4-6  | 17865.5      | 0.02771 |
| DHCR7          | 17332        | 0.02617 | SERPINB2  | 17961.7<br>5 | 0.02801 |
| GNB2L1         | 17379        | 0.02631 | KCTD11    | 18012.2<br>5 | 0.02812 |
| ENO4           | 17440.5      | 0.02652 | SGCE      | 18043.7<br>5 | 0.02823 |
| hsa-mir-125b-1 | 17483.2<br>5 | 0.02665 | ERH       | 18045.2<br>5 | 0.02823 |
| IMPDH1         | 17502.7<br>5 | 0.02673 | CAPN13    | 18051.2<br>5 | 0.02825 |
| LIG4           | 17640.5      | 0.02715 | KIF9      | 18121        | 0.02849 |
| LIN54          | 17658.5      | 0.02721 | PRPSAP1   | 18150.5      | 0.02858 |
| hsa-mir-4512   | 17665.7<br>5 | 0.02724 | POLG2     | 18196        | 0.02872 |
| hsa-mir-1302-7 | 17676.2<br>5 | 0.02727 | APCDD1L   | 18244.2<br>5 | 0.02886 |
| hsa-mir-3196   | 17770.5      | 0.02758 | HLA-DQA1  | 18259.5      | 0.02890 |
| ASB4           | 17774.7<br>5 | 0.02760 | NUB1      | 18331        | 0.02912 |
| GIN52          | 17783        | 0.02763 | CCDC80    | 18355.7<br>5 | 0.02921 |
| GNAQ           | 17800.5      | 0.02768 | NEK10     | 18376.2<br>5 | 0.02926 |
| DIO3           | 17817        | 0.02774 | TRA2B     | 18379        | 0.02927 |
| SPATA7         | 17823.2<br>5 | 0.02777 | PHC1      | 18394.2<br>5 | 0.02932 |
| COX20          | 17886.2<br>5 | 0.02797 | DOCK7     | 18405        | 0.02936 |
| SOX5           | 17887        | 0.02797 | RBBP8     | 18432.5      | 0.02945 |
| SIGLEC7        | 17916.5      | 0.02804 | LRSAM1    | 18492.2<br>5 | 0.02965 |
| C5orf52        | 17928.7<br>5 | 0.02807 | GRINA     | 18542.2<br>5 | 0.02983 |

|                                       |              |         |              |              |         |
|---------------------------------------|--------------|---------|--------------|--------------|---------|
| ZCCHC14                               | 17993.2<br>5 | 0.02831 | hsa-mir-3193 | 18569.2<br>5 | 0.02994 |
| KIAA0922                              | 18008        | 0.02836 | PACS1        | 18585.5      | 0.02999 |
| FOXF2                                 | 18030.7<br>5 | 0.02845 | SMC3         | 18675.7<br>5 | 0.03028 |
| hsa-mir-6885                          | 18124.7<br>5 | 0.02870 | HIST1H2AE    | 18720.5      | 0.03040 |
| FAM110A                               | 18172.2<br>5 | 0.02887 | WDR62        | 18791.2<br>5 | 0.03062 |
| SF3A2                                 | 18176        | 0.02888 | PLEKHM2      | 18857.5      | 0.03083 |
| HMBOX1                                | 18239.2<br>5 | 0.02906 | TMBIM1       | 18952.2<br>5 | 0.03114 |
| SIT1                                  | 18252.5      | 0.02908 | PTBP2        | 19014.2<br>5 | 0.03134 |
| OR2T8                                 | 18254.5      | 0.02909 | GRSF1        | 19014.5      | 0.03134 |
| CDH1                                  | 18260.5      | 0.02911 | HDGFRP2      | 19122.7<br>5 | 0.03166 |
| NonTargetingControlGuideForHuman_0820 | 18324.7<br>5 | 0.02934 | CEP135       | 19151.5      | 0.03172 |
| HERC1                                 | 18343        | 0.02940 | ACVR2B       | 19232.2<br>5 | 0.03196 |
| NEK8                                  | 18368.7<br>5 | 0.02951 | MSANTD4      | 19251.2<br>5 | 0.03200 |
| BIK                                   | 18453.7<br>5 | 0.02979 | C9orf89      | 19442        | 0.03267 |
| MIB2                                  | 18473        | 0.02984 | HAUS7        | 19495        | 0.03282 |
| C16orf55                              | 18492        | 0.02989 | SUPT20HL1    | 19504.7<br>5 | 0.03285 |
| LTBP2                                 | 18513.2<br>5 | 0.02997 | PDLIM1       | 19514.7<br>5 | 0.03289 |
| GOLGA7                                | 18533        | 0.03001 | GCM1         | 19565        | 0.03306 |
| MRPS18B                               | 18550.5      | 0.03006 | hsa-mir-3124 | 19678        | 0.03346 |
| KDM5C                                 | 18559.2<br>5 | 0.03008 | P2RX3        | 19680.7<br>5 | 0.03347 |
| OTX1                                  | 18579        | 0.03015 | hsa-mir-4682 | 19721        | 0.03361 |
| SLX4                                  | 18596        | 0.03020 | NARS2        | 19723.7<br>5 | 0.03362 |
| GBP5                                  | 18634.5      | 0.03033 | hsa-mir-4475 | 19727        | 0.03363 |
| TM4SF1                                | 18657.5      | 0.03041 | OR2AE1       | 19768.5      | 0.03377 |
| EIF4E1B                               | 18690        | 0.03052 | KRTAP12-3    | 19770.2<br>5 | 0.03377 |
| C1orf173                              | 18761        | 0.03072 | PPIF         | 19796.5      | 0.03387 |
| DYNC1LI2                              | 18814.5      | 0.03088 | POLR2J       | 19894.2<br>5 | 0.03417 |
| CCDC61                                | 18874.2<br>5 | 0.03109 | NDUFA4       | 19926.7<br>5 | 0.03430 |
| REPS1                                 | 18925.5      | 0.03126 | HOXD11       | 19977.7<br>5 | 0.03449 |
| KCTD12                                | 18979.5      | 0.03142 | SLC4A7       | 20002.7<br>5 | 0.03459 |
| PRR25                                 | 18989.7<br>5 | 0.03144 | CCL25        | 20147.2<br>5 | 0.03509 |
| COX17                                 | 19076        | 0.03169 | RNF182       | 20202.5      | 0.03525 |
| PUSL1                                 | 19102        | 0.03178 | SRA1         | 20222.7<br>5 | 0.03533 |
| GDPD4                                 | 19158        | 0.03196 | HDAC9        | 20236.2<br>5 | 0.03539 |
| ZNF28                                 | 19232.5      | 0.03220 | RECK         | 20267.7<br>5 | 0.03551 |
| METRNL                                | 19246.2<br>5 | 0.03224 | FAM177B      | 20328.2<br>5 | 0.03573 |
| EIF3J                                 | 19249.5      | 0.03225 | GNAZ         | 20342.7<br>5 | 0.03576 |

|                |              |         |                                           |              |         |
|----------------|--------------|---------|-------------------------------------------|--------------|---------|
| SERTAD4        | 19254.2<br>5 | 0.03227 | TWF1                                      | 20350.7<br>5 | 0.03579 |
| HECTD1         | 19263.2<br>5 | 0.03230 | FGGY                                      | 20362.5      | 0.03584 |
| NAIF1          | 19311.7<br>5 | 0.03244 | SPRED3                                    | 20380.5      | 0.03591 |
| HIF1A          | 19339        | 0.03253 | CCL8                                      | 20406.7<br>5 | 0.03602 |
| TMEM209        | 19381.7<br>5 | 0.03270 | FUT8                                      | 20443.7<br>5 | 0.03615 |
| hsa-mir-346    | 19488.5      | 0.03305 | KCNIP4                                    | 20541.7<br>5 | 0.03648 |
| FZD5           | 19557        | 0.03327 | NonTargetingControlGuideForHuman_041<br>8 | 20587.5      | 0.03662 |
| ST7L           | 19604.2<br>5 | 0.03344 | DSG4                                      | 20725.7<br>5 | 0.03711 |
| XAB2           | 19630        | 0.03352 | CDKN2C                                    | 20728.2<br>5 | 0.03712 |
| PER2           | 19666        | 0.03367 | hsa-mir-4660                              | 20798        | 0.03734 |
| PCDHGB4        | 19702.5      | 0.03378 | FAM161B                                   | 20806.7<br>5 | 0.03739 |
| RORB           | 19748        | 0.03395 | hsa-mir-125b-1                            | 20810.5      | 0.03739 |
| ATRNL1         | 19786        | 0.03404 | BET1                                      | 20890.5      | 0.03772 |
| SLBP           | 19829.5      | 0.03420 | MTRNR2L7                                  | 20933        | 0.03789 |
| SATL1          | 19861.7<br>5 | 0.03431 | C14orf28                                  | 20986.5      | 0.03809 |
| MEF2D          | 19875        | 0.03434 | BEND4                                     | 21000.5      | 0.03814 |
| TOR1AIP1       | 19881.5      | 0.03437 | UVRAG                                     | 21002        | 0.03815 |
| CYB561A3       | 19982        | 0.03468 | DDX4                                      | 21021        | 0.03823 |
| hsa-mir-4283-2 | 19988.2<br>5 | 0.03470 | KRT77                                     | 21208.7<br>5 | 0.03891 |
| CCDC91         | 20079.2<br>5 | 0.03504 | P2RY10                                    | 21225.2<br>5 | 0.03897 |
| PKN2           | 20123.2<br>5 | 0.03520 | MYRIP                                     | 21240.2<br>5 | 0.03905 |
| hsa-mir-5688   | 20253.2<br>5 | 0.03571 | MYH1                                      | 21271.5      | 0.03915 |
| NOL7           | 20271.7<br>5 | 0.03578 | C2CD4B                                    | 21283.7<br>5 | 0.03919 |
| ZKSCAN5        | 20279.5      | 0.03582 | TIMM10B                                   | 21328.5      | 0.03938 |
| CCDC28A        | 20341        | 0.03601 | TSPAN2                                    | 21371        | 0.03951 |
| TNRC18         | 20415        | 0.03625 | SMC6                                      | 21491.5      | 0.03999 |
| AMOTL2         | 20457        | 0.03636 | FAM129B                                   | 21511.5      | 0.04006 |
| SNRNP35        | 20503        | 0.03652 | SCUBE1                                    | 21604.2<br>5 | 0.04044 |
| RAP1GDS1       | 20511.2<br>5 | 0.03656 | RABEP1                                    | 21611.2<br>5 | 0.04046 |
| hsa-mir-939    | 20548.2<br>5 | 0.03668 | hsa-mir-3195                              | 21620.7<br>5 | 0.04048 |
| CYTH1          | 20569.7<br>5 | 0.03680 | hsa-mir-606                               | 21747.7<br>5 | 0.04099 |
| AHSG           | 20594        | 0.03688 | TAB3                                      | 21780.2<br>5 | 0.04113 |
| CHCHD10        | 20673.5      | 0.03713 | MATN3                                     | 21805.2<br>5 | 0.04119 |
| CBLL1          | 20749.2<br>5 | 0.03738 | C19orf59                                  | 21854.5      | 0.04137 |
| KRTAP19-7      | 20780        | 0.03748 | CAPN3                                     | 21887.5      | 0.04150 |
| PRSS16         | 20823.2<br>5 | 0.03765 | SEC61A1                                   | 21890        | 0.04152 |
| GOLGA7B        | 20832.2<br>5 | 0.03768 | MGST3                                     | 21900        | 0.04155 |

|                |              |         |                                       |              |         |
|----------------|--------------|---------|---------------------------------------|--------------|---------|
| FAM32A         | 20853.2<br>5 | 0.03777 | GCNT2                                 | 21951        | 0.04172 |
| ARSD           | 20950.7<br>5 | 0.03813 | STXBP1                                | 22009.5      | 0.04193 |
| hsa-mir-1299   | 20984.2<br>5 | 0.03827 | CRIM1                                 | 22037        | 0.04204 |
| PGM3           | 21001.2<br>5 | 0.03835 | NonTargetingControlGuideForHuman_0820 | 22058.7<br>5 | 0.04213 |
| APOBEC1        | 21027.7<br>5 | 0.03844 | FYB                                   | 22138.2<br>5 | 0.04243 |
| SFR1           | 21044.7<br>5 | 0.03853 | TMEM130                               | 22140        | 0.04244 |
| ENO4           | 21216.2<br>5 | 0.03922 | VPS28                                 | 22170.2<br>5 | 0.04258 |
| SLC6A18        | 21248.2<br>5 | 0.03934 | ANKFY1                                | 22229.5      | 0.04281 |
| CXADR          | 21280.5      | 0.03945 | LARGE                                 | 22260.5      | 0.04294 |
| ZFYVE28        | 21305        | 0.03953 | EPB41L1                               | 22260.7<br>5 | 0.04294 |
| DNAJC16        | 21322.5      | 0.03959 | UBP1                                  | 22327        | 0.04320 |
| SPDYA          | 21374.2<br>5 | 0.03981 | ZCCHC2                                | 22348.2<br>5 | 0.04327 |
| hsa-mir-4435-1 | 21389        | 0.03986 | IER2                                  | 22350.5      | 0.04328 |
| ARL2BP         | 21435.7<br>5 | 0.04007 | SRPK2                                 | 22466        | 0.04369 |
| HLC5           | 21550.5      | 0.04049 | OR11A1                                | 22511.5      | 0.04389 |
| CCDC62         | 21574.5      | 0.04058 | SLC39A7                               | 22531        | 0.04398 |
| RAD21          | 21602        | 0.04069 | MORF4L2                               | 22544        | 0.04402 |
| hsa-mir-30d    | 21621.5      | 0.04077 | FBLN5                                 | 22597.7<br>5 | 0.04425 |
| CASKIN2        | 21659        | 0.04089 | ZDHHC2                                | 22612.7<br>5 | 0.04430 |
| EMID1          | 21703.7<br>5 | 0.04106 | BTF3L4                                | 22643.2<br>5 | 0.04443 |
| TWIST2         | 21747        | 0.04123 | CSNK1A1L                              | 22782.5      | 0.04491 |
| SMC5           | 21985.5      | 0.04216 | POLE2                                 | 22843.5      | 0.04517 |
| ECM1           | 21987.7<br>5 | 0.04217 | IMPACT                                | 22942.5      | 0.04553 |
| APPL1          | 21996.2<br>5 | 0.04220 | CXorf61                               | 23000.2<br>5 | 0.04577 |
| COL11A1        | 22032.7<br>5 | 0.04234 | LRRFIP1                               | 23009.2<br>5 | 0.04581 |
| MRPS24         | 22057.7<br>5 | 0.04244 | AAED1                                 | 23017.2<br>5 | 0.04584 |
| THEMIS2        | 22069.2<br>5 | 0.04248 | XKRX                                  | 23111.2<br>5 | 0.04621 |
| FOSL2          | 22149.5      | 0.04278 | ASB16                                 | 23134.7<br>5 | 0.04630 |
| PUS10          | 22188        | 0.04294 | TMEM51                                | 23146        | 0.04634 |
| GPR12          | 22200        | 0.04298 | KCNT1                                 | 23225.5      | 0.04668 |
| SCAF11         | 22342        | 0.04349 | INSL4                                 | 23258.5      | 0.04682 |
| ISCU           | 22406        | 0.04376 | ANGPTL3                               | 23277.2<br>5 | 0.04686 |
| EIF3I          | 22408        | 0.04377 | RNF133                                | 23305        | 0.04698 |
| POLR2B         | 22472.7<br>5 | 0.04404 | RAI2                                  | 23426.5      | 0.04752 |
| ACSL1          | 22531.2<br>5 | 0.04429 | PEX11A                                | 23452.5      | 0.04760 |
| ZNF232         | 22575        | 0.04448 | RBM15                                 | 23495.5      | 0.04781 |
| KAT5           | 22613.7<br>5 | 0.04463 | FAM150B                               | 23531.2<br>5 | 0.04796 |

|              |              |         |         |              |         |
|--------------|--------------|---------|---------|--------------|---------|
| ZGPAT        | 22639.7<br>5 | 0.04472 | FTH1    | 23536.7<br>5 | 0.04799 |
| ZBBX         | 22667        | 0.04484 | FGB     | 23657        | 0.04853 |
| RLN3         | 22675        | 0.04486 | NCAPG2  | 23726        | 0.04880 |
| PPCS         | 22745.7<br>5 | 0.04516 | MAML2   | 23741.5      | 0.04886 |
| TMIGD1       | 22894.5      | 0.04571 | CCDC151 | 23765.5      | 0.04895 |
| RPL6         | 22926.2<br>5 | 0.04584 | ZNF592  | 23786.5      | 0.04904 |
| ST8SIA6      | 22995.2<br>5 | 0.04613 | ZNF804A | 23851.5      | 0.04932 |
| MRFAP1       | 22998.5      | 0.04615 | GPR87   | 23872.7<br>5 | 0.04943 |
| POLR3G       | 23053.5      | 0.04640 | FAM117B | 23911        | 0.04957 |
| PRKCI        | 23093.5      | 0.04657 | CARHSP1 | 23931.5      | 0.04966 |
| BTBD2        | 23193.7<br>5 | 0.04696 | GDNF    | 23938.2<br>5 | 0.04969 |
| UCP3         | 23207.5      | 0.04702 |         |              |         |
| NPTX1        | 23211.5      | 0.04704 |         |              |         |
| LRSAM1       | 23371.7<br>5 | 0.04772 |         |              |         |
| hsa-mir-3684 | 23532.7<br>5 | 0.04836 |         |              |         |
| RHOXF2B      | 23593.7<br>5 | 0.04859 |         |              |         |
| E2F6         | 23621.5      | 0.04869 |         |              |         |
| TOR3A        | 23716.5      | 0.04906 |         |              |         |
| RNF113B      | 23819.7<br>5 | 0.04951 |         |              |         |
| CNTNAP2      | 23868.5      | 0.04971 |         |              |         |
| LHX1         | 23919.2<br>5 | 0.04995 |         |              |         |



**Table 2: Transcriptional dynamics of genes depleted in replicate 2CT genome-scale CRISPR screens**

| Gene name        | Fold change mRNA 6hr coculture/0hr | pvalue (-log10) |
|------------------|------------------------------------|-----------------|
| <i>RPAP2</i>     | 3.83                               | 1.386153        |
| <i>BIRC2</i>     | 3.49                               | 2.095161        |
| <i>ESD</i>       | 2.78                               | 1.655263        |
| <i>TWF1</i>      | 2.15                               | 1.127761        |
| <i>EGR2</i>      | 2.13                               | 1.422591        |
| <i>SCAF11</i>    | 1.92                               | 2.493371        |
| <i>TOR1AIP1</i>  | 1.73                               | 1.654647        |
| <i>LPGAT1</i>    | 1.67                               | 1.594682        |
| <i>TXLNB</i>     | 1.65                               | 0.736541        |
| <i>SERTAD2</i>   | 1.62                               | 1.964377        |
| <i>COG3</i>      | 1.55                               | 0.951055        |
| <i>ALG11</i>     | 1.53                               | 0.630745        |
| <i>RBL2</i>      | 1.42                               | 1.730386        |
| <i>BCL2</i>      | 1.39                               | 1.333402        |
| <i>ENDOD1</i>    | 1.35                               | 0.880535        |
| <i>AKIRIN1</i>   | 1.31                               | 0.846618        |
| <i>EAF2</i>      | 1.3                                | 0.313509        |
| <i>C14orf119</i> | 1.27                               | 0.752152        |
| <i>PRPF3</i>     | 1.22                               | 0.822365        |
| <i>ENY2</i>      | 1.21                               | 0.719565        |
| <i>TRA2B</i>     | 1.18                               | 0.809857        |
| <i>SNX1</i>      | 1.17                               | 0.933405        |
| <i>THRAP3</i>    | 1.17                               | 1.068386        |
| <i>ISCU</i>      | 1.09                               | 0.277723        |
| <i>WDR45B</i>    | 1.03                               | 0.136798        |
| <i>EIF3I</i>     | 1.02                               | 0.092091        |
| <i>TMX4</i>      | -1.03                              | 0.052917        |
| <i>ARSD</i>      | -1.05                              | 0.069726        |
| <i>HHLA3</i>     | -1.05                              | 0.042312        |
| <i>PPP2R5D</i>   | -1.06                              | 0.239111        |
| <i>SART3</i>     | -1.06                              | 0.201343        |
| <i>CINP</i>      | -1.13                              | 0.501461        |
| <i>MANSC1</i>    | -1.13                              | 0.079621        |
| <i>NUDC</i>      | -1.29                              | 0.689154        |
| <i>SLC25A25</i>  | -1.31                              | 1.128394        |
| <i>RPS16</i>     | -1.36                              | 1.127576        |

|                 |       |          |
|-----------------|-------|----------|
| <i>FAM32A</i>   | -1.4  | 1.213536 |
| <i>DPM2</i>     | -1.62 | 2.076065 |
| <i>C15orf61</i> | -1.72 | 1.713913 |
| <i>CYB5R3</i>   | -1.76 | 2.226299 |
| <i>NEK8</i>     | -1.81 | 2.116487 |
| <i>FBXL15</i>   | -2.15 | 2.270763 |

**Table 3: Mapping top 2CT CRISPR depleted genes to protein-coding genes**

| Gene ID                                | Mapped ID | Gene name/Gene Symbol                                                       |
|----------------------------------------|-----------|-----------------------------------------------------------------------------|
| HUMAN   HGNC=13921   UniProtKB=O95870  | ABHD16A   | Protein ABHD16A;ABHD16A;ortholog                                            |
| HUMAN   HGNC=19195   UniProtKB=Q6H8Q1  | ABLIM2    | Actin-binding LIM protein 2;ABLIM2;ortholog                                 |
| HUMAN   HGNC=18075   UniProtKB=Q9NZD4  | AHSP      | Alpha-hemoglobin-stabilizing protein;AHSP;ortholog                          |
| HUMAN   HGNC=25744   UniProtKB=Q9H9L7  | AKIRIN1   | Akirin-1;AKIRIN1;ortholog                                                   |
| HUMAN   HGNC=32456   UniProtKB=Q2TA A5 | ALG11     | GDP-Man:Man(3)GlcNAc(2)-PP-Dol alpha-1,2-mannosyltransferase;ALG11;ortholog |
| HUMAN   HGNC=28658   UniProtKB=Q6DCA0  | AMMECR1L  | AMMECR1-like protein;AMMECR1L;ortholog                                      |
| HUMAN   HGNC=29135   UniProtKB=Q6UB98  | ANKRD12   | Ankyrin repeat domain-containing protein 12;ANKRD12;ortholog                |
| HUMAN   HGNC=23725   UniProtKB=Q5T5U3  | ARHGAP21  | Rho GTPase-activating protein 21;ARHGAP21;ortholog                          |
| HUMAN   HGNC=25361   UniProtKB=Q8N264  | ARHGAP24  | Rho GTPase-activating protein 24;ARHGAP24;ortholog                          |
| HUMAN   HGNC=721   UniProtKB=P54793    | ARSF      | Arylsulfatase F;ARSF;ortholog                                               |
| HUMAN   HGNC=588   UniProtKB=O94817    | ATG12     | Ubiquitin-like protein ATG12;ATG12;ortholog                                 |
| HUMAN   HGNC=855   UniProtKB=P27449    | ATP6V0C   | V-type proton ATPase 16 kDa proteolipid subunit;ATP6V0C;ortholog            |
| HUMAN   HGNC=24137   UniProtKB=Q6L9W6  | B4GALNT3  | Beta-1,4-N-acetylgalactosaminyltransferase 3;B4GALNT3;ortholog              |
| HUMAN   HGNC=950   UniProtKB=Q92560    | BAP1      | Ubiquitin carboxyl-terminal hydrolase BAP1;BAP1;ortholog                    |
| HUMAN   HGNC=990   UniProtKB=P10415    | BCL2      | Apoptosis regulator Bcl-2;BCL2;ortholog                                     |
| HUMAN   HGNC=590   UniProtKB=Q13490    | BIRC2     | Baculoviral IAP repeat-containing protein 2;BIRC2;ortholog                  |
| HUMAN   HGNC=15519   UniProtKB=Q14137  | BOP1      | Ribosome biogenesis protein BOP1;BOP1;ortholog                              |
| HUMAN   HGNC=27441   UniProtKB=Q3KP22  | C11orf85  | Membrane-anchored junction protein;C11orf85;ortholog                        |
| HUMAN   HGNC=32331   UniProtKB=Q5T5A4  | C1orf194  | Uncharacterized protein C1orf194;C1orf194;ortholog                          |
| HUMAN   HGNC=28250   UniProtKB=Q6P1W5  | C1orf94   | Uncharacterized protein C1orf94;C1orf94;ortholog                            |
| HUMAN   HGNC=28772   UniProtKB=Q9BVC5  | C2orf49   | Ashwin;C2orf49;ortholog                                                     |
| HUMAN   HGNC=26951   UniProtKB=Q86YL5  | C8orf42   | Testis development-related protein;TDRP;ortholog                            |
| HUMAN   HGNC=18200   UniProtKB=Q8WXE0  | CASKIN2   | Caskin-2;CASKIN2;ortholog                                                   |
| HUMAN   HGNC=1516   UniProtKB=P04040   | CAT       | Catalase;CAT;ortholog                                                       |
| HUMAN   HGNC=29588   UniProtKB=Q5BJE1  | CCDC178   | Coiled-coil domain-containing protein 178;CCDC178;ortholog                  |
| HUMAN   HGNC=30723   UniProtKB=Q6P9F0  | CCDC62    | Coiled-coil domain-containing protein 62;CCDC62;ortholog                    |

|                                    |         |                                                                     |
|------------------------------------|---------|---------------------------------------------------------------------|
| HUMAN HGNC=1578 UniProtKB=P20248   | CCNA2   | Cyclin-A2;CCNA2;ortholog                                            |
| HUMAN HGNC=1766 UniProtKB=Q9ULB5   | CDH7    | Cadherin-7;CDH7;ortholog                                            |
| HUMAN HGNC=1837 UniProtKB=P53567   | CEBPG   | CCAAT/enhancer-binding protein gamma;CEBPG;ortholog                 |
| HUMAN HGNC=1876 UniProtKB=O15519   | CFLAR   | CASP8 and FADD-like apoptosis regulator;CFLAR;ortholog              |
| HUMAN HGNC=23789 UniProtKB=Q9BW66  | CINP    | Cyclin-dependent kinase 2-interacting protein;CINP;ortholog         |
| HUMAN HGNC=2080 UniProtKB=P54105   | CLNS1A  | Methylosome subunit pICln;CLNS1A;ortholog                           |
| HUMAN HGNC=16999 UniProtKB=Q92989  | CLP1    | Polyribonucleotide 5'-hydroxyl-kinase Clp1;CLP1;ortholog            |
| HUMAN HGNC=18623 UniProtKB=Q96MW5  | COG8    | Conserved oligomeric Golgi complex subunit 8;COG8;ortholog          |
| HUMAN HGNC=17888 UniProtKB=O75575  | CRCP    | DNA-directed RNA polymerase III subunit RPC9;CRCP;ortholog          |
| HUMAN HGNC=2396 UniProtKB=P53673   | CRYBA4  | Beta-crystallin A4;CRYBA4;ortholog                                  |
| HUMAN HGNC=15982 UniProtKB=Q8IWT3  | CUL9    | Cullin-9;CUL9;ortholog                                              |
| HUMAN HGNC=10664 UniProtKB=Q6UX04  | CWC27   | Peptidyl-prolyl cis-trans isomerase CWC27 homolog;CWC27;ortholog    |
| HUMAN HGNC=2873 UniProtKB=P00387   | CYB5R3  | NADH-cytochrome b5 reductase 3;CYB5R3;ortholog                      |
| HUMAN HGNC=21191 UniProtKB=P59103  | DAOA    | D-amino acid oxidase activator;DAOA;ortholog                        |
| HUMAN HGNC=17347 UniProtKB=Q9BUQ8  | DDX23   | Probable ATP-dependent RNA helicase DDX23;DDX23;ortholog            |
| HUMAN HGNC=25360 UniProtKB=Q5T1V6  | DDX59   | Probable ATP-dependent RNA helicase DDX59;DDX59;ortholog            |
| HUMAN HGNC=15861 UniProtKB=Q9H5Z1  | DHX35   | Probable ATP-dependent RNA helicase DHX35;DHX35;ortholog            |
| HUMAN HGNC=2680 UniProtKB=Q9BTC0   | DIDO1   | Death-inducer obliterator 1;DIDO1;ortholog                          |
| HUMAN HGNC=2902 UniProtKB=Q92796   | DLG3    | Disks large homolog 3;DLG3;ortholog                                 |
| HUMAN HGNC=29157 UniProtKB=Q9Y2G8  | DNAJC16 | DnaJ homolog subfamily C member 16;DNAJC16;ortholog                 |
| HUMAN HGNC=2981 UniProtKB=Q9ULA0   | DNPEP   | Aspartyl aminopeptidase;DNPEP;ortholog                              |
| HUMAN HGNC=23028 UniProtKB=Q9H4A9  | DPEP2   | Dipeptidase 2;DPEP2;ortholog                                        |
| HUMAN HGNC=3011 UniProtKB=Q07507   | DPT     | Dermatopontin;DPT;ortholog                                          |
| HUMAN HGNC=3208 UniProtKB=P24534   | EEF1B2  | Elongation factor 1-beta;EEF1B2;ortholog                            |
| HUMAN HGNC=3226 UniProtKB=P98172   | EFNB1   | Ephrin-B1;EFNB1;ortholog                                            |
| HUMAN HGNC=3239 UniProtKB=P11161   | EGR2    | E3 SUMO-protein ligase EGR2;EGR2;ortholog                           |
| HUMAN HGNC=3272 UniProtKB=Q13347   | EIF3I   | Eukaryotic translation initiation factor 3 subunit I;EIF3I;ortholog |
| HUMAN HGNC=3296 UniProtKB=Q04637   | EIF4G1  | Eukaryotic translation initiation factor 4 gamma 1;EIF4G1;ortholog  |
| HUMAN HGNC=3297 UniProtKB=P78344   | EIF4G2  | Eukaryotic translation initiation factor 4 gamma 2;EIF4G2;ortholog  |
| HUMAN HGNC=28430 UniProtKB=Q9BV81  | EMC6    | ER membrane protein complex subunit 6;EMC6;ortholog                 |
| HUMAN HGNC=1316 UniProtKB=Q9HC35   | EML4    | Echinoderm microtubule-associated protein-like 4;EML4;ortholog      |
| HUMAN HGNC=24449 UniProtKB=Q9NP A8 | ENY2    | Transcription and mRNA export factor ENY2;ENY2;ortholog             |
| HUMAN HGNC=3415 UniProtKB=P01588   | EPO     | Erythropoietin;EPO;ortholog                                         |
| HUMAN HGNC=3471 UniProtKB=P11474   | ESRRA   | Steroid hormone receptor ERR1;ESRRA;ortholog                        |

|                                   |          |                                                                                     |
|-----------------------------------|----------|-------------------------------------------------------------------------------------|
| HUMAN HGNC=3522 UniProtKB=O95677  | EYA4     | Eyes absent homolog 4;EYA4;ortholog                                                 |
| HUMAN HGNC=24563 UniProtKB=Q9Y421 | FAM32A   | Protein FAM32A;FAM32A;ortholog                                                      |
| HUMAN HGNC=1253 UniProtKB=P58499  | FAM3B    | Protein FAM3B;FAM3B;ortholog                                                        |
| HUMAN HGNC=18786 UniProtKB=Q14320 | FAM50A   | Protein FAM50A;FAM50A;ortholog                                                      |
| HUMAN HGNC=17800 UniProtKB=Q9NSD9 | FARSB    | Phenylalanine--tRNA ligase beta subunit;FARSB;ortholog                              |
| HUMAN HGNC=3595 UniProtKB=Q14517  | FAT1     | Protocadherin Fat 1;FAT1;ortholog                                                   |
| HUMAN HGNC=3600 UniProtKB=P23142  | FBLN1    | Fibulin-1;FBLN1;ortholog                                                            |
| HUMAN HGNC=16712 UniProtKB=Q969H0 | FBXW7    | F-box/WD repeat-containing protein 7;FBXW7;ortholog                                 |
| HUMAN HGNC=18522 UniProtKB=Q5VV16 | FOXD4L5  | Forkhead box protein D4-like 5;FOXD4L5;ortholog                                     |
| HUMAN HGNC=30968 UniProtKB=A6NGK3 | GAGE10   | G antigen 10;GAGE10;ortholog                                                        |
| HUMAN HGNC=14264 UniProtKB=Q9NY12 | GAR1     | H/ACA ribonucleoprotein complex subunit 1;GAR1;ortholog                             |
| HUMAN HGNC=11960 UniProtKB=Q6Y7W6 | GIGYF2   | PERQ amino acid-rich with GYF domain-containing protein 2;GIGYF2;ortholog           |
| HUMAN HGNC=28980 UniProtKB=Q14691 | GIN51    | DNA replication complex GINS protein PSF1;GIN51;ortholog                            |
| HUMAN HGNC=4374 UniProtKB=O60234  | GMFG     | Glia maturation factor gamma;GMFG;ortholog                                          |
| HUMAN HGNC=18707 UniProtKB=Q7Z6J2 | GRASP    | General receptor for phosphoinositides 1-associated scaffold protein;GRASP;ortholog |
| HUMAN HGNC=4579 UniProtKB=P39086  | GRIK1    | Glutamate receptor ionotropic, kainate 1;GRIK1;ortholog                             |
| HUMAN HGNC=33383 UniProtKB=A0PIZ3 | GXYLT2   | Glucoside xylosyltransferase 2;GXYLT2;ortholog                                      |
| HUMAN HGNC=4801 UniProtKB=P40939  | HADH     | Trifunctional enzyme subunit alpha, mitochondrial;HADHA;ortholog                    |
| HUMAN HGNC=4803 UniProtKB=P55084  | HADHB    | Trifunctional enzyme subunit beta, mitochondrial;HADHB;ortholog                     |
| HUMAN HGNC=4848 UniProtKB=O43613  | HCRTR1   | Orexin receptor type 1;HCRTR1;ortholog                                              |
| HUMAN HGNC=28982 UniProtKB=Q12766 | HMGXB3   | HMG domain-containing protein 3;HMGXB3;ortholog                                     |
| HUMAN HGNC=25451 UniProtKB=Q1KMD3 | HNRNPUL2 | Heterogeneous nuclear ribonucleoprotein U-like protein 2;HNRNPUL2;ortholog          |
| HUMAN HGNC=25155 UniProtKB=Q86XE5 | HOGA1    | 4-hydroxy-2-oxoglutarate aldolase, mitochondrial;HOGA1;ortholog                     |
| HUMAN HGNC=5129 UniProtKB=P31273  | HOXC8    | Homeobox protein Hox-C8;HOXC8;ortholog                                              |
| HUMAN HGNC=5961 UniProtKB=Q9Y6K9  | IKBKG    | NF-kappa-B essential modulator;IKBKG;ortholog                                       |
| HUMAN HGNC=5993 UniProtKB=P14778  | IL1R1    | Interleukin-1 receptor type 1;IL1R1;ortholog                                        |
| HUMAN HGNC=15561 UniProtKB=Q9UBH0 | IL36RN   | Interleukin-36 receptor antagonist protein;IL36RN;ortholog                          |
| HUMAN HGNC=6029 UniProtKB=P15248  | IL9      | Interleukin-9;IL9;ortholog                                                          |
| HUMAN HGNC=29882 UniProtKB=Q9H1K1 | ISCU     | Iron-sulfur cluster assembly enzyme ISCU, mitochondrial;ISCU;ortholog               |
| HUMAN HGNC=28977 UniProtKB=P53990 | IST1     | IST1 homolog;IST1;ortholog                                                          |
| HUMAN HGNC=6150 UniProtKB=P06756  | ITGAV    | Integrin alpha-V;ITGAV;ortholog                                                     |
| HUMAN HGNC=6173 UniProtKB=O43736  | ITM2A    | Integral membrane protein 2A;ITM2A;ortholog                                         |
| HUMAN HGNC=21071 UniProtKB=Q6PHW0 | IYD      | Iodotyrosine deiodinase 1;IYD;ortholog                                              |
| HUMAN HGNC=6211 UniProtKB=P23352  | KAL1     | Anosmin-1;ANOS1;ortholog                                                            |

|                                   |           |                                                                                      |
|-----------------------------------|-----------|--------------------------------------------------------------------------------------|
| HUMAN HGNC=6217 UniProtKB=Q9BVA0  | KATNB1    | Katanin p80 WD40 repeat-containing subunit B1;KATNB1;ortholog                        |
| HUMAN HGNC=6246 UniProtKB=Q9H3M0  | KCNF1     | Potassium voltage-gated channel subfamily F member 1;KCNF1;ortholog                  |
| HUMAN HGNC=6249 UniProtKB=Q9UJ96  | KCNG2     | Potassium voltage-gated channel subfamily G member 2;KCNG2;ortholog                  |
| HUMAN HGNC=6304 UniProtKB=P24390  | KDEL1     | ER lumen protein-retaining receptor 1;KDEL1;ortholog                                 |
| HUMAN HGNC=29266 UniProtKB=Q9P2G3 | KLHL14    | Kelch-like protein 14;KLHL14;ortholog                                                |
| HUMAN HGNC=16905 UniProtKB=O60662 | KLHL41    | Kelch-like protein 41;KLHL41;ortholog                                                |
| HUMAN HGNC=6356 UniProtKB=Q96PQ7  | KLHL5     | Kelch-like protein 5;KLHL5;ortholog                                                  |
| HUMAN HGNC=6359 UniProtKB=Q9UBX7  | KLK11     | Kallikrein-11;KLK11;ortholog                                                         |
| HUMAN HGNC=20523 UniProtKB=P60371 | KRTAP10-6 | Keratin-associated protein 10-6;KRTAP10-6;ortholog                                   |
| HUMAN HGNC=23598 UniProtKB=Q6L8H2 | KRTAP5-3  | Keratin-associated protein 5-3;KRTAP5-3;ortholog                                     |
| HUMAN HGNC=17095 UniProtKB=Q15031 | LARS2     | Probable leucine--tRNA ligase, mitochondrial;LARS2;ortholog                          |
| HUMAN HGNC=29460 UniProtKB=Q5TA81 | LCE2C     | Late cornified envelope protein 2C;LCE2C;ortholog                                    |
| HUMAN HGNC=17787 UniProtKB=O14910 | LIN7A     | Protein lin-7 homolog A;LIN7A;ortholog                                               |
| HUMAN Gene=LPPR5 UniProtKB=Q32ZL2 | LPPR5     | Phospholipid phosphatase-related protein type 5;PLPPR5;ortholog                      |
| HUMAN HGNC=6690 UniProtKB=Q12912  | LRMP      | Lymphoid-restricted membrane protein;LRMP;ortholog                                   |
| HUMAN HGNC=19742 UniProtKB=Q96L50 | LRR1      | Leucine-rich repeat protein 1;LRR1;ortholog                                          |
| HUMAN HGNC=19410 UniProtKB=Q86VH5 | LRRTM3    | Leucine-rich repeat transmembrane neuronal protein 3;LRRTM3;ortholog                 |
| HUMAN HGNC=13940 UniProtKB=Q9Y333 | LSM2      | U6 snRNA-associated Sm-like protein Lsm2;LSM2;ortholog                               |
| HUMAN HGNC=1968 UniProtKB=Q99698  | LYST      | Lysosomal-trafficking regulator;LYST;ortholog                                        |
| HUMAN HGNC=25183 UniProtKB=Q8TC57 | M1AP      | Meiosis 1 arrest protein;M1AP;ortholog                                               |
| HUMAN HGNC=6780 UniProtKB=Q9ULX9  | MAFF      | Transcription factor MafF;MAFF;ortholog                                              |
| HUMAN HGNC=6823 UniProtKB=Q9UKM7  | MAN1B1    | Endoplasmic reticulum mannosyl-oligosaccharide 1,2-alpha-mannosidase;MAN1B1;ortholog |
| HUMAN HGNC=13961 UniProtKB=P35410 | MAS1L     | Mas-related G-protein coupled receptor MRG;MAS1L;ortholog                            |
| HUMAN HGNC=6904 UniProtKB=P31153  | MAT2A     | S-adenosylmethionine synthase isoform type-2;MAT2A;ortholog                          |
| HUMAN HGNC=19866 UniProtKB=Q05BQ5 | MBTD1     | MBT domain-containing protein 1;MBTD1;ortholog                                       |
| HUMAN HGNC=7095 UniProtKB=O15344  | MID1      | E3 ubiquitin-protein ligase Midline-1;MID1;ortholog                                  |
| HUMAN HGNC=21460 UniProtKB=Q8TD10 | MIPOL1    | Mirror-image polydactyly gene 1 protein;MIPOL1;ortholog                              |
| HUMAN HGNC=29636 UniProtKB=Q8NEH6 | MNS1      | Meiosis-specific nuclear structural protein 1;MNS1;ortholog                          |
| HUMAN HGNC=17617 UniProtKB=Q96LA9 | MRGPRX4   | Mas-related G-protein coupled receptor member X4;MRGPRX4;ortholog                    |
| HUMAN HGNC=16635 UniProtKB=P82673 | MRPS35    | 28S ribosomal protein S35, mitochondrial;MRPS35;ortholog                             |
| HUMAN HGNC=7394 UniProtKB=P07438  | MT1B      | Metallothionein-1B;MT1B;ortholog                                                     |
| HUMAN HGNC=7411 UniProtKB=O94776  | MTA2      | Metastasis-associated protein MTA2;MTA2;ortholog                                     |
| HUMAN HGNC=7748 UniProtKB=Q6P3R8  | NEK5      | Serine/threonine-protein kinase Nek5;NEK5;ortholog                                   |
| HUMAN HGNC=29933 UniProtKB=Q86WI3 | NLRC5     | Protein NLRC5;NLRC5;ortholog                                                         |

|                                       |          |                                                                                               |
|---------------------------------------|----------|-----------------------------------------------------------------------------------------------|
| HUMAN   HGNC=17877   UniProtKB=Q9HAN9 | NMNAT1   | Nicotinamide/nicotinic acid mononucleotide adenylyltransferase 1;NMNAT1;ortholog              |
| HUMAN   HGNC=32203   UniProtKB=Q5H8A3 | NMS      | Neuromedin-S;NMS;ortholog                                                                     |
| HUMAN   HGNC=16821   UniProtKB=P78316 | NOP14    | Nucleolar protein 14;NOP14;ortholog                                                           |
| HUMAN   HGNC=7895   UniProtKB=Q99743  | NPAS2    | Neuronal PAS domain-containing protein 2;NPAS2;ortholog                                       |
| HUMAN   HGNC=14124   UniProtKB=Q12980 | NPRL3    | Nitrogen permease regulator 3-like protein;NPRL3;ortholog                                     |
| HUMAN   HGNC=8266   UniProtKB=Q8NH16  | OR2L2    | Olfactory receptor 2L2;OR2L2;ortholog                                                         |
| HUMAN   HGNC=8268   UniProtKB=Q96R28  | OR2M2    | Olfactory receptor 2M2;OR2M2;ortholog                                                         |
| HUMAN   HGNC=8510   UniProtKB=Q92882  | OSTF1    | Osteoclast-stimulating factor 1;OSTF1;ortholog                                                |
| HUMAN   HGNC=20882   UniProtKB=Q9NWT1 | PAK1IP1  | p21-activated protein kinase-interacting protein 1;PAK1IP1;ortholog                           |
| HUMAN   HGNC=8621   UniProtKB=P23759  | PAX7     | Paired box protein Pax-7;PAX7;ortholog                                                        |
| HUMAN   HGNC=9719   UniProtKB=P50542  | PEX5     | Peroxisomal targeting signal 1 receptor;PEX5;ortholog                                         |
| HUMAN   HGNC=8940   UniProtKB=O14832  | PHYH     | Phytanoyl-CoA dioxygenase, peroxisomal;PHYH;ortholog                                          |
| HUMAN   HGNC=8971   UniProtKB=O00443  | PIK3C2A  | Phosphatidylinositol 4-phosphate 3-kinase C2 domain-containing subunit alpha;PIK3C2A;ortholog |
| HUMAN   HGNC=20764   UniProtKB=Q96S99 | PLEKHF1  | Pleckstrin homology domain-containing family F member 1;PLEKHF1;ortholog                      |
| HUMAN   HGNC=9200   UniProtKB=O00411  | POLRMT   | DNA-directed RNA polymerase, mitochondrial;POLRMT;ortholog                                    |
| HUMAN   HGNC=23531   UniProtKB=Q5VZY2 | PPAPDC1A | Phospholipid phosphatase 4;PLPP4;ortholog                                                     |
| HUMAN   HGNC=9358   UniProtKB=P48147  | PREP     | Prolyl endopeptidase;PREP;ortholog                                                            |
| HUMAN   HGNC=17348   UniProtKB=O43395 | PRPF3    | U4/U6 small nuclear ribonucleoprotein Prp3;PRPF3;ortholog                                     |
| HUMAN   HGNC=16463   UniProtKB=O75400 | PRPF40A  | Pre-mRNA-processing factor 40 homolog A;PRPF40A;ortholog                                      |
| HUMAN   HGNC=9480   UniProtKB=Q9NQE7  | PRSS16   | Thymus-specific serine protease;PRSS16;ortholog                                               |
| HUMAN   HGNC=19096   UniProtKB=Q8NDX1 | PSD4     | PH and SEC7 domain-containing protein 4;PSD4;ortholog                                         |
| HUMAN   HGNC=17822   UniProtKB=Q9H7Z7 | PTGES2   | Prostaglandin E synthase 2;PTGES2;ortholog                                                    |
| HUMAN   HGNC=9650   UniProtKB=P17706  | PTPN2    | Tyrosine-protein phosphatase non-receptor type 2;PTPN2;ortholog                               |
| HUMAN   HGNC=9692   UniProtKB=P26022  | PTX3     | Pentraxin-related protein PTX3;PTX3;ortholog                                                  |
| HUMAN   HGNC=26505   UniProtKB=Q3MIT2 | PUS10    | Putative tRNA pseudouridine synthase Pus10;PUS10;ortholog                                     |
| HUMAN   HGNC=29982   UniProtKB=P83859 | QRFP     | Orexigenic neuropeptide QRFP;QRFP;ortholog                                                    |
| HUMAN   HGNC=9795   UniProtKB=Q92696  | RABGGTA  | Geranylgeranyl transferase type-2 subunit alpha;RABGGTA;ortholog                              |
| HUMAN   HGNC=9807   UniProtKB=O75943  | RAD17    | Cell cycle checkpoint protein RAD17;RAD17;ortholog                                            |
| HUMAN   HGNC=9832   UniProtKB=P55895  | RAG2     | V(D)J recombination-activating protein 2;RAG2;ortholog                                        |
| HUMAN   HGNC=9840   UniProtKB=P11234  | RALB     | Ras-related protein Ral-B;RALB;ortholog                                                       |
| HUMAN   HGNC=15864   UniProtKB=Q9BYM8 | RBCK1    | RanBP-type and C3HC4-type zinc finger-containing protein 1;RBCK1;ortholog                     |
| HUMAN   HGNC=9894   UniProtKB=Q08999  | RBL2     | Retinoblastoma-like protein 2;RBL2;ortholog                                                   |
| HUMAN   HGNC=16502   UniProtKB=P58872 | RHBDL3   | Rhomboid-related protein 3;RHBDL3;ortholog                                                    |
| HUMAN   HGNC=21158   UniProtKB=Q8IUD6 | RNF135   | E3 ubiquitin-protein ligase RNF135;RNF135;ortholog                                            |

|                                        |           |                                                                                                |
|----------------------------------------|-----------|------------------------------------------------------------------------------------------------|
| HUMAN   HGNC=13432   UniProtKB=Q9NV58  | RNF19A    | E3 ubiquitin-protein ligase RNF19A;RNF19A;ortholog                                             |
| HUMAN   HGNC=17985   UniProtKB=Q8WZ75  | ROBO4     | Roundabout homolog 4;ROBO4;ortholog                                                            |
| HUMAN   HGNC=25791   UniProtKB=Q8IXW5  | RPAP2     | Putative RNA polymerase II subunit B1 CTD phosphatase RPAP2;RPAP2;ortholog                     |
| HUMAN   HGNC=30350   UniProtKB=Q9H9Y2  | RPF1      | Ribosome production factor 1;RPF1;ortholog                                                     |
| HUMAN   HGNC=10302   UniProtKB=P30050  | RPL12     | 60S ribosomal protein L12;RPL12;ortholog                                                       |
| HUMAN   HGNC=10371   UniProtKB=P05388  | RPLP0     | 60S acidic ribosomal protein P0;RPLP0;ortholog                                                 |
| HUMAN   HGNC=10402   UniProtKB=P39019  | RPS19     | 40S ribosomal protein S19;RPS19;ortholog                                                       |
| HUMAN   HGNC=6502   UniProtKB=P08865   | RPSA      | 40S ribosomal protein SA;RPSA;ortholog                                                         |
| HUMAN   HGNC=10450   UniProtKB=O14718  | RRH       | Visual pigment-like receptor peropsin;RRH;ortholog                                             |
| HUMAN   HGNC=13081   UniProtKB=Q9BY12  | SCAPER    | S phase cyclin A-associated protein in the endoplasmic reticulum;SCAPER;ortholog               |
| HUMAN   HGNC=21088   UniProtKB=Q865K9  | SCD5      | Stearoyl-CoA desaturase 5;SCD5;ortholog                                                        |
| HUMAN   HGNC=15950   UniProtKB=Q9BWW7  | SCRT1     | Transcriptional repressor scratch 1;SCRT1;ortholog                                             |
| HUMAN   HGNC=8951   UniProtKB=P07093   | SERPINE2  | Glia-derived nexin;SERPINE2;ortholog                                                           |
| HUMAN   HGNC=30784   UniProtKB=Q14140  | SERTAD2   | SERTA domain-containing protein 2;SERTAD2;ortholog                                             |
| HUMAN   HGNC=12950   UniProtKB=Q15637  | SF1       | Splicing factor 1;SF1;ortholog                                                                 |
| HUMAN   HGNC=10809   UniProtKB=Q13326  | SGCG      | Gamma-sarcoglycan;SGCG;ortholog                                                                |
| HUMAN   HGNC=25321   UniProtKB=Q9H0F6  | SHARPIN   | Sharpin;SHARPIN;ortholog                                                                       |
| HUMAN   HGNC=11014   UniProtKB=Q99726  | SLC30A3   | Zinc transporter 3;SLC30A3;ortholog                                                            |
| HUMAN   HGNC=11047   UniProtKB=Q9UN76  | SLC6A14   | Sodium- and chloride-dependent neutral and basic amino acid transporter B(0+);SLC6A14;ortholog |
| HUMAN   HGNC=23092   UniProtKB=Q8TCU3  | SLC7A13   | Solute carrier family 7 member 13;SLC7A13;ortholog                                             |
| HUMAN   HGNC=14013   UniProtKB=Q9NTJ3  | SMC4      | Structural maintenance of chromosomes protein 4;SMC4;ortholog                                  |
| HUMAN   HGNC=20465   UniProtKB=Q8IY18  | SMC5      | Structural maintenance of chromosomes protein 5;SMC5;ortholog                                  |
| HUMAN   HGNC=18122   UniProtKB=Q9H6I2  | SOX17     | Transcription factor SOX-17;SOX17;ortholog                                                     |
| HUMAN   HGNC=32006   UniProtKB=Q5VV P1 | SPATA31A6 | Spermatogenesis-associated protein 31A6;SPATA31A6;ortholog                                     |
| HUMAN   HGNC=24508   UniProtKB=B4DYI2  | SPATA31C2 | Spermatogenesis-associated protein 31C2;SPATA31C2;ortholog                                     |
| HUMAN   HGNC=24031   UniProtKB=Q9HBM1  | SPC25     | Kinetochore protein Spc25;SPC25;ortholog                                                       |
| HUMAN   HGNC=11337   UniProtKB=Q99909  | SSX3      | Protein SSX3;SSX3;ortholog                                                                     |
| HUMAN   HGNC=10863   UniProtKB=Q16842  | ST3GAL2   | CMP-N-acetylneuraminic acid-6-sialyltransferase 2;ST3GAL2;ortholog                             |
| HUMAN   HGNC=23317   UniProtKB=P61647  | ST8SIA6   | Alpha-2,8-sialyltransferase 8F;ST8SIA6;ortholog                                                |
| HUMAN   HGNC=11389   UniProtKB=Q15831  | STK11     | Serine/threonine-protein kinase STK11;STK11;ortholog                                           |
| HUMAN   HGNC=30796   UniProtKB=Q9Y3F4  | STRAP     | Serine-threonine kinase receptor-associated protein;STRAP;ortholog                             |
| HUMAN   HGNC=11427   UniProtKB=Q9UNE7  | STUB1     | E3 ubiquitin-protein ligase CHIP;STUB1;ortholog                                                |
| HUMAN   HGNC=19694   UniProtKB=Q6Z WJ1 | STXBP4    | Syntaxin-binding protein 4;STXBP4;ortholog                                                     |
| HUMAN   HGNC=27411   UniProtKB=Q6PIF2  | SYCE2     | Synaptonemal complex central element protein 2;SYCE2;ortholog                                  |

|                                   |           |                                                                              |
|-----------------------------------|-----------|------------------------------------------------------------------------------|
| HUMAN HGNC=11523 UniProtKB=O95359 | TACC2     | Transforming acidic coiled-coil-containing protein 2;TACC2;ortholog          |
| HUMAN HGNC=11585 UniProtKB=O60907 | TBL1X     | F-box-like/WD repeat-containing protein TBL1X;TBL1X;ortholog                 |
| HUMAN HGNC=20854 UniProtKB=Q9H0W7 | THAP2     | THAP domain-containing protein 2;THAP2;ortholog                              |
| HUMAN HGNC=11793 UniProtKB=P52888 | THOP1     | Thimet oligopeptidase;THOP1;ortholog                                         |
| HUMAN HGNC=11803 UniProtKB=O95411 | TIAF1     | TGFB1-induced anti-apoptotic factor 1;TIAF1;ortholog                         |
| HUMAN HGNC=14523 UniProtKB=Q96MW7 | TIGD1     | Tigger transposable element-derived protein 1;TIGD1;ortholog                 |
| HUMAN HGNC=33522 UniProtKB=A6NGC4 | TLCD2     | TLC domain-containing protein 2;TLCD2;ortholog                               |
| HUMAN HGNC=24257 UniProtKB=Q9HC24 | TMBIM4    | Protein lifeguard 4;TMBIM4;ortholog                                          |
| HUMAN HGNC=16996 UniProtKB=Q15363 | TMED2     | Transmembrane emp24 domain-containing protein 2;TMED2;ortholog               |
| HUMAN HGNC=16823 UniProtKB=P17152 | TMEM11    | Transmembrane protein 11, mitochondrial;TMEM11;ortholog                      |
| HUMAN HGNC=30366 UniProtKB=Q92545 | TMEM131   | Transmembrane protein 131;TMEM131;ortholog                                   |
| HUMAN HGNC=31723 UniProtKB=Q24JQ0 | TMEM241   | Transmembrane protein 241;TMEM241;ortholog                                   |
| HUMAN HGNC=32393 UniProtKB=Q6ZNR0 | TMEM91    | Transmembrane protein 91;TMEM91;ortholog                                     |
| HUMAN HGNC=32431 UniProtKB=Q6UXZ0 | TMIGD1    | Transmembrane and immunoglobulin domain-containing protein 1;TMIGD1;ortholog |
| HUMAN HGNC=11905 UniProtKB=O14763 | TNFRSF10B | Tumor necrosis factor receptor superfamily member 10B;TNFRSF10B;ortholog     |
| HUMAN HGNC=11983 UniProtKB=O75674 | TOM1L1    | TOM1-like protein 1;TOM1L1;ortholog                                          |
| HUMAN HGNC=12032 UniProtKB=Q12933 | TRAF2     | TNF receptor-associated factor 2;TRAF2;ortholog                              |
| HUMAN HGNC=30832 UniProtKB=Q96Q05 | TRAPPC9   | Trafficking protein particle complex subunit 9;TRAPPC9;ortholog              |
| HUMAN HGNC=31454 UniProtKB=Q6A555 | TXNDC8    | Thioredoxin domain-containing protein 8;TXNDC8;ortholog                      |
| HUMAN HGNC=12477 UniProtKB=P51965 | UBE2E1    | Ubiquitin-conjugating enzyme E2 E1;UBE2E1;ortholog                           |
| HUMAN HGNC=12492 UniProtKB=P61088 | UBE2N     | Ubiquitin-conjugating enzyme E2 N;UBE2N;ortholog                             |
| HUMAN HGNC=15664 UniProtKB=Q9NYU1 | UGGT2     | UDP-glucose:glycoprotein glucosyltransferase 2;UGGT2;ortholog                |
| HUMAN HGNC=20332 UniProtKB=Q9H1J1 | UPF3A     | Regulator of nonsense transcripts 3A;UPF3A;ortholog                          |
| HUMAN HGNC=20485 UniProtKB=O75317 | USP12     | Ubiquitin carboxyl-terminal hydrolase 12;USP12;ortholog                      |
| HUMAN HGNC=14340 UniProtKB=Q9UBQ0 | VPS29     | Vacuolar protein sorting-associated protein 29;VPS29;ortholog                |
| HUMAN HGNC=25072 UniProtKB=Q5MNZ6 | WDR45B    | WD repeat domain phosphoinositide-interacting protein 3;WDR45B;ortholog      |
| HUMAN HGNC=14540 UniProtKB=Q9H4A3 | WNK1      | Serine/threonine-protein kinase WNK1;WNK1;ortholog                           |
| HUMAN HGNC=12786 UniProtKB=O00755 | WNT7A     | Protein Wnt-7a;WNT7A;ortholog                                                |
| HUMAN HGNC=28304 UniProtKB=Q96EC8 | YIPF6     | Protein YIPF6;YIPF6;ortholog                                                 |
| HUMAN HGNC=31675 UniProtKB=Q9Y5A9 | YTHDF2    | YTH domain-containing family protein 2;YTHDF2;ortholog                       |
| HUMAN HGNC=17908 UniProtKB=O43298 | ZBTB43    | Zinc finger and BTB domain-containing protein 43;ZBTB43;ortholog             |
| HUMAN HGNC=29362 UniProtKB=Q9C0D7 | ZC3H12C   | Probable ribonuclease ZC3H12C;ZC3H12C;ortholog                               |
| HUMAN HGNC=20368 UniProtKB=Q5T200 | ZC3H13    | Zinc finger CCCH domain-containing protein 13;ZC3H13;ortholog                |
| HUMAN HGNC=14881 UniProtKB=O60315 | ZEB2      | Zinc finger E-box-binding homeobox 2;ZEB2;ortholog                           |



|                                   |         |                                                                |
|-----------------------------------|---------|----------------------------------------------------------------|
| HUMAN HGNC=12863 UniProtKB=Q9Y6Q3 | ZFP37   | Zinc finger protein 37 homolog;ZFP37;ortholog                  |
| HUMAN HGNC=20997 UniProtKB=Q9H091 | ZMYND15 | Zinc finger MYND domain-containing protein 15;ZMYND15;ortholog |
| HUMAN HGNC=12907 UniProtKB=Q15973 | ZNF124  | Zinc finger protein 124;ZNF124;ortholog                        |
| HUMAN HGNC=12920 UniProtKB=P52737 | ZNF136  | Zinc finger protein 136;ZNF136;ortholog                        |
| HUMAN HGNC=23708 UniProtKB=Q6ZR52 | ZNF493  | Zinc finger protein 493;ZNF493;ortholog                        |
| HUMAN HGNC=13168 UniProtKB=Q03936 | ZNF92   | Zinc finger protein 92;ZNF92;ortholog                          |
| HUMAN HGNC=25820 UniProtKB=Q9C0D3 | ZYG11B  | Protein zyg-11 homolog B;ZYG11B;ortholog                       |

**Table 4: Preliminary Identification of tumor targets for combination immunotherapy**

| Druggable Gene Category      | Matching Gene Count | Matching Gene(s)                                                                                                                                                                                                                                                                                                                                                                                                                                                                                      |
|------------------------------|---------------------|-------------------------------------------------------------------------------------------------------------------------------------------------------------------------------------------------------------------------------------------------------------------------------------------------------------------------------------------------------------------------------------------------------------------------------------------------------------------------------------------------------|
| DRUGGABLE GENOME             | 68                  | ABHD16A, ARSF, BAP1, BCL2, BIRC2, CAT, CCNA2, CFLAR, CWC27, CYB5R3, DNAJC16, DNPEP, DPEP2, DPT, EFN1, EPO, ESRR, FAM3B, FAT1, FBLN1, GRIK1, HCRTR1, HNRNPUL2, IKBKG, IL1R1, IL36RN, IL9, ITGAV, ANOS1, KCNF1, KCNG2, KLHL5, KLK11, LARS2, LRRTM3, MAN1B1, MAS1L, MID1, MRGPRX4, NEK5, NMS, OR2L2, OR2M2, PIK3C2A, PREP, PRSS16, PTPN2, PTX3, QRF, RABGGTA, RBCK1, RHBDL3, RNF135, RRH, SCD5, SERPINE2, SHARPIN, SLC6A14, SLC7A13, ST3GAL2, STK11, THOP1, TNFRSF10B, TXNDC8, UBE2N, USP12, WNK1, WNT7A |
| KINASE                       | 22                  | CCNA2, CLP1, DLG3, EPO, FBXW7, GMFG, HMGXB3, IKBKG, LRRTM3, NEK5, NLRC5, PIK3C2A, PTPN2, RALB, RBL2, STK11, TNFRSF10B, TOM1L1, TRAF2, UBE2N, WNK1, ZEB2                                                                                                                                                                                                                                                                                                                                               |
| TUMOR SUPPRESSOR             | 18                  | BAP1, BCL2, BIRC2, BOP1, CCNA2, CUL9, EIF4G1, EIF4G2, FBXW7, GIGYF2, PRPF40A, RAD17, RBL2, SMC5, STK11, STXB4, TOM1L1, UBE2E1                                                                                                                                                                                                                                                                                                                                                                         |
| PROTEASE                     | 17                  | BAP1, BIRC2, CFLAR, DNPEP, DPEP2, FBLN1, ANOS1, KLK11, NEK5, PREP, PRSS16, RHBDL3, SERPINE2, THOP1, TNFRSF10B, TRAF2, USP12                                                                                                                                                                                                                                                                                                                                                                           |
| TRANSPORTER                  | 15                  | ATP6V0C, BCL2, DLG3, EPO, GRIK1, ITGAV, KCNF1, KCNG2, SLC30A3, SLC6A14, SLC7A13, TMEM241, UPF3A, VPS29, WNK1                                                                                                                                                                                                                                                                                                                                                                                          |
| SERINE THREONINE KINASE      | 10                  | CCNA2, IKBKG, NEK5, RALB, STK11, TNFRSF10B, TRAF2, UBE2N, WNK1, ZEB2                                                                                                                                                                                                                                                                                                                                                                                                                                  |
| HISTONE MODIFICATION         | 9                   | BAP1, CCNA2, ENY2, EYA4, MTA2, PAX7, TBL1X, UBE2E1, UBE2N                                                                                                                                                                                                                                                                                                                                                                                                                                             |
| DNA REPAIR                   | 8                   | CEBPG, CINP, EYA4, NPAS2, RAD17, SMC5, STUB1, UBE2N                                                                                                                                                                                                                                                                                                                                                                                                                                                   |
| G PROTEIN COUPLED RECEPTOR   | 7                   | CRCP, HCRTR1, MAS1L, MRGPRX4, OR2L2, OR2M2, RRH                                                                                                                                                                                                                                                                                                                                                                                                                                                       |
| ION CHANNEL                  | 7                   | DLG3, EPO, GRIK1, ITGAV, KCNF1, KCNG2, WNK1                                                                                                                                                                                                                                                                                                                                                                                                                                                           |
| TRANSCRIPTION FACTOR BINDING | 7                   | BCL2, CEBPG, EGR2, MTA2, RNF19A, SOX17, TBL1X                                                                                                                                                                                                                                                                                                                                                                                                                                                         |
| CELL SURFACE                 | 6                   | EPO, IL1R1, ITGAV, SERPINE2, TNFRSF10B, WNT7A                                                                                                                                                                                                                                                                                                                                                                                                                                                         |
| CLINICALLY ACTIONABLE        | 6                   | BAP1, BCL2, FAT1, FBXW7, SOX17, STK11                                                                                                                                                                                                                                                                                                                                                                                                                                                                 |
| TYROSINE KINASE              | 5                   | FBXW7, GMFG, LRRTM3, PTPN2, WNK1                                                                                                                                                                                                                                                                                                                                                                                                                                                                      |
| TRANSCRIPTION FACTOR COMPLEX | 4                   | MTA2, NPAS2, RBL2, SOX17                                                                                                                                                                                                                                                                                                                                                                                                                                                                              |

|                                  |   |                        |
|----------------------------------|---|------------------------|
| B30_2 SPRY DOMAIN                | 3 | HNRNPUL2, MID1, RNF135 |
| DRUG RESISTANCE                  | 3 | BCL2, CAT, HADH        |
| NEUTRAL ZINC METALLOPEPTIDASE    | 3 | DNPEP, DPEP2, THOP1    |
| PROTEASE INHIBITOR               | 3 | BIRC2, ANOS1, SERPINE2 |
| PROTEIN PHOSPHATASE              | 3 | EYA4, PTPN2, RPAP2     |
| EXTERNAL SIDE OF PLASMA MEMBRANE | 2 | ITGAV, SERPINE2        |
| GROWTH FACTOR                    | 2 | GMFG, IL9              |
| HORMONE ACTIVITY                 | 2 | EPO, QRFP              |
| NUCLEAR HORMONE RECEPTOR         | 2 | ESRRA, SF1             |
| THIOREDOXIN                      | 2 | DNAJC16, TXNDC8        |
| ABC TRANSPORTER                  | 1 | ATP6V0C                |
| LIPID KINASE                     | 1 | RBL2                   |
| PHOSPHATIDYLINOSITOL 3 KINASE    | 1 | PIK3C2A                |

**Table 5: Inhibitors utilized in study**

| Inhibitor         | Alternative nomenclature | Target  | Source                      |
|-------------------|--------------------------|---------|-----------------------------|
| Venetoclax        | ABT-199                  | BCL2    | Selleckchem                 |
| Navitoclax        | ABT-263                  | BCL2    | Selleckchem                 |
| LCL161            |                          | BIRC2   | Selleckchem                 |
| Birinapant        |                          | BIRC2   | Selleckchem                 |
| Fomepizole        |                          | CAT     | Selleckchem                 |
| Tosedostat        | CHR2797                  | DNPEP   | Tocris                      |
| XCT790            |                          | ESRRA   | Sigma Aldrich               |
| Compound 29       |                          | ESRRA   | Synthesized by collaborator |
| Topiramate        |                          | GRIK1   | Selleckchem                 |
| ACET              |                          | GRIK1   | Tocris                      |
| Almorexant        | ACT-078573               | HCRTR1  | Selleckchem                 |
| SB334867          |                          | HCRTR1  | R&D systems                 |
| Blocking antibody | AF269                    | IL1R1   | R&D systems                 |
| Blocking antibody | AF209                    | IL9     | R&D systems                 |
| Blocking antibody | ab16821                  | ITGAV   | Abcam                       |
| Cilengitide       |                          | ITGAV   | Selleckchem                 |
| Guanidine HCL     |                          | KCNF1   | Sigma Aldrich               |
| Dalfampridine     | 4-aminopyridine          | KCNF1   | Sigma Aldrich               |
| Guanidine HCL     |                          | KCNG2   | Sigma Aldrich               |
| Dalfampridine     | 4-aminopyridine          | KCNG2   | Sigma Aldrich               |
| Dactolisib        | BEZ235                   | PIK3C2A | Selleckchem                 |

|            |          |         |               |
|------------|----------|---------|---------------|
| Apitolisib | GDC-0980 | PIK3C2A | Selleckchem   |
| S17092     |          | PREP    | Sigma Aldrich |
| WNK463     |          | WNK1    | Selleckchem   |

**Table 6: sgRNA sequences**

| sgRNA Name      | sgRNA sequence        |
|-----------------|-----------------------|
| RPAP2 sgRNA1    | GGCCCAGCGAAGTCCGCCAT  |
| RPAP2 sgRNA2    | AAATTCTCGTAACTTGGCAG  |
| RPAP2 sgRNA3    | CGCTGCTCTCGAAAAGCCGC  |
| BIRC2 sgRNA1    | TGGAGACGTATTCTTAGAGG  |
| BIRC2 sgRNA2    | ACATATTCAACTTTCCCCGC  |
| BIRC2 sgRNA3    | ATATTCAACTTTCCCCGCCG  |
| ESD sgRNA1      | CGTTGTTTTTCGATTGCAAG  |
| ESD sgRNA2      | TAGACCACAAACACTTACGA  |
| ESD sgRNA3      | CACTTACGAGGGCTGGTATC  |
| EGR2 sgRNA1     | GCAAGACGCCGGTGCACGAG  |
| EGR2 sgRNA2     | TCAAGGTGTCCGGGTCCGAG  |
| EGR2 sgRNA3     | CTCGTGCACCGGCGTCTTGC  |
| SCAF11 sgRNA1   | TGTCTTCGAGCTATCTGCGC  |
| SCAF11 sgRNA2   | TCTGGTTGGGTATCTAACCG  |
| SCAF11 sgRNA3   | CTGTACCGATCATTTCCTCG  |
| TOR1AIP1 sgRNA1 | CATAAACTACGTCGGCTGG   |
| TOR1AIP1 sgRNA2 | TCAACAACATATGGCGGGCGA |
| TOR1AIP1 sgRNA3 | GCGCGTACTACCTTCGGTCT  |
| LPGAT1 sgRNA1   | AAGCGGTTCTGGTATATCGA  |
| LPGAT1 sgRNA2   | CTTCATGGTCGTCAACAACC  |
| LPGAT1 sgRNA3   | CTTACTGTCCAGCACTCGAA  |
| SERTAD2 sgRNA1  | CCAGGGGCGTAGTGCTTCCG  |
| SERTAD2 sgRNA2  | CGTAGTGCTTCCGAGGTCCG  |
| SERTAD2 sgRNA3  | GTAGTGCTTCCGAGGTCCG   |
| RBL2 sgRNA1     | CCGCCTCAACATGGACGAGG  |
| RBL2 sgRNA2     | CGACGGCATAGCGCACCCCT  |
| RBL2 sgRNA3     | CTATGCGTAGCTGTAGAAAC  |
| BCL2 sgRNA1     | AAGCGTCCCCGCGCGGTGAA  |
| BCL2 sgRNA2     | ACCTGACGCCCTTACCAGCG  |
| BCL2 sgRNA3     | GGGGCCGTACAGTTCCACAA  |
